# Supplementary material for: Hyperactivated Glycolysis Drives Spatially-Patterned Kupffer Cell Depletion in MASLD
Source: eLife journal article supplement (doi:10.7554/elife.109206), 2025-11-26

# Raw unedited membranes

Figure 4-Figure supplement 1

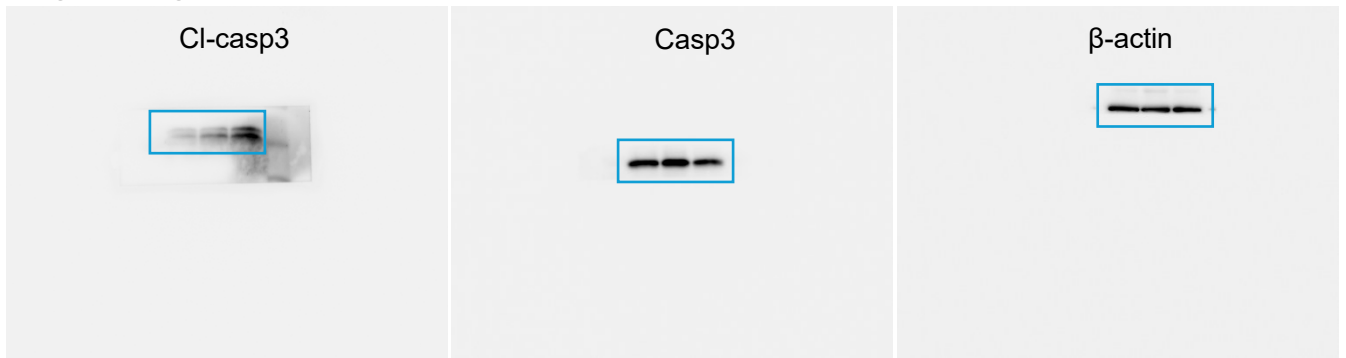

Supplement: fig4-figsupp1-data2 [file elife-109206-fig4-figsupp1-data2-v1.pdf]
