# Supplementary material for: Hyperactivated glycolysis drives spatially patterned Kupffer cell depletion in MASLD
Source: eLife. 2026 May 26;14:RP109206. doi: 10.7554/eLife.109206 (PMC13211875; doi:10.7554/eLife.109206)
Supplement: Figure 1—figure supplement 1—source data 1. [file elife-109206-fig1-figsupp1-data1.xlsx]

## Sheet: Figure S1A
Sirius red							One-way analysis of variance (ANOVA)	P value	P value summary	Significantly different (P < 0.05)?
Group	%Area Average	Average	Normalize				WT HFHC 0w VS WT HFHC 4w	0.902	ns	No
WT HFHC 0w M1	0.674714	0.413395	1.63213				WT HFHC 0w VS WT HFHC 16w	0.459	ns	No
WT HFHC 0w M2	0.5615		1.35826				WT HFHC 4w VS WT HFHC 16w	0.392	ns	No
WT HFHC 0w M3	0.3392		0.820522
WT HFHC 0w M4	0.078167		0.189085
WT HFHC 4w M1	0.494		1.19498
WT HFHC 4w M2	0.496667		1.20143
WT HFHC 4w M3	0.2624		0.634744
WT HFHC 4w M4	0.337		0.8152
WT HFHC 16w M1	0.546333		1.32158
WT HFHC 16w M2	0.467833		1.13168
WT HFHC 16w M3	0.641833		1.55259
WT HFHC 16w M4	0.386667		0.935345
Group	Steatosis(0-3)	Intralobular inflammation(0-3)	Ballooning of hepatocytes(0-2)	MASLD Activity Score	Average MASLD Activity Score		One-way analysis of variance (ANOVA)	P value	P value summary	Significantly different (P < 0.05)?
WT HFHC 0w M1	0	0	0	0	0		WT HFHC 0w VS WT HFHC 4w	0.044	*	Yes
	0	0	0	0			WT HFHC 0w VS WT HFHC 16w	<0.001	***	Yes
	0	0	0	0			WT HFHC 4w VS WT HFHC 16w	0.001	**	Yes
WT HFHC 0w M2	0	0	0	0	0
	0	0	0	0
	0	0	0	0
WT HFHC 0w M3	0	0	0	0	0
	0	0	0	0
	0	0	0	0
	0	0	0	0
WT HFHC 0w M4	0	0	0	0	0
	0	0	0	0
	0	0	0	0
	0	0	0	0
WT HFHC 4w M1	1	0	0	1	1
	1	0	0	1
	1	0	0	1
WT HFHC 4w M2	0	1	0	1	1
	1	0	0	1
	1	0	0	1
WT HFHC 4w M3	2	0	0	2	1.66667
	2	0	0	2
	1	0	0	1
	2	0	0	2
	2	0	0	2
	1	0	0	1
WT HFHC 4w M4	0	0	0	0	0.6
	0	0	0	0
	1	0	0	1
	1	0	0	1
	1	0	0	1
WT HFHC 16w M1	3	0	1	4	3.83333
	2	0	2	4
	3	0	2	5
	2	0	1	3
	3	0	1	4
	2	0	1	3
WT HFHC 16w M2	2	1	0	3	1.85714
	2	0	0	2
	1	0	0	1
	1	0	0	1
	1	0	1	2
	1	0	0	1
	2	0	1	3
WT HFHC 16w M3	3	1	2	6	4
	2	0	1	3
	3	0	1	4
	2	0	1	3
	3	0	2	5
	2	0	1	3
WT HFHC 16w M4	3	0	2	5	3.875
	3	0	2	5
	2	0	2	4
	2	0	1	3
	2	0	1	3
	2	0	1	3
	3	0	1	4
	2	0	2	4

## Sheet: Figure S1B
Weight(g)
	NCD				HFHC
Week	M1	M2	M3	M4	M1	M2	M3	M4
0w	21.33	22.69	19.6	20.29	22.23	22.14	22.84	20
1w	23.22	24.44	20.52	20.7	23.12	22.61	23.39	20.91
2w	23.41	24.16	21.34	21.26	23.81	23.61	24.39	21.63
3w	23.48	25.09	20.83	22.38	25.1	23.92	25.26	22
4w	25.06	26.31	22.36	23.8	27.14	24.76	27.44	23.03
5w	25.52	26.81	22.49	24.18	27.96	25.81	28.19	23.24
6w	25.57	26.55	22.63	24.23	28.02	25.56	28.57	23.6
7w	26.22	27.26	23.04	24.01	29.47	25.95	28.85	25.05
8w	26.97	27.44	22.97	24.26	29.46	26.45	28.96	25.24
9w	27.94	28.13	23.85	25.06	31.04	26.59	29.43	26.3
10w	27.3	27.87	24.19	24.95	33.04	28.65	31.48	27.63
11w	28.54	29.37	24.78	25.81	34.94	29.73	31.97	28.52
12w	29.14	29.75	25.15	26.51	35.53	29.81	32.95	29.02
13w	29.39	30.94	24.95	26.87	38.14	31.27	34.48	29.4
14w	30.01	32.24	25.1	26.87	40.71	32.8	36.01	30.42
15w	29.92	31.72	25.31	27.21	43.41	34.95	37.65	31.57
16w	31.14	32.31	26.15	31.91	44.64	36.78	38.37	32.89

## Sheet: Figure S1C
Serum ALT activity									t` test	P value	P value summary	Significantly different (P < 0.05)?
Group	Test well OD value	Control well OD value	Absolute OD value	X2	989.46X2+363.35X+0.2219	Dilution factor	ALT activity(IU/L)		WT NCD VS WT HFD	0.049	***	Yes
WT NCD M1	0.351	0.2712	0.0798	0.00636804	35.5182	1	35.5182
WT NCD M2	0.3555	0.2712	0.0843	0.00710649	37.8839	1	37.8839
WT NCD M3	0.3092	0.2712	0.038	0.001444	15.458	1	15.458
WT NCD M4	0.2896	0.2712	0.0184	0.00033856	7.24253	1	7.24253
WT HFHC M1	0.3744	0.2508	0.1236	0.015277	60.2479	1	60.2479
WT HFHC M2	0.3202	0.24935	0.07085	0.00501972	30.9321	1	30.9321
WT HFHC M3	0.3641	0.24935	0.11475	0.0131676	54.9451	1	54.9451
WT HFHC M4	0.3517	0.2508	0.1009	0.0101808	46.9574	1	46.9574
Serum AST activity									t` test	P value	P value summary	Significantly different (P < 0.05)?
	Test well OD value	Control well OD value	Absolute OD value	X2	2933.5X2-5.3221X+2.0576	Dilution factor	AST activity(IU/L)		WT NCD VS WT HFD	0.059	ns	No
WT NCD M1	0.3765	0.2675	0.109	0.011881	36.1997	1	36.1997
WT NCD M2	0.3537	0.2675	0.0862	0.00743044	23.3143	1	23.3143
WT NCD M3	0.3041	0.2675	0.0366	0.00133956	5.77768	1	5.77768
WT NCD M4	0.2848	0.2675	0.0173	0.00029929	2.8402	1	2.8402
WT HFHC M1	0.4204	0.25045	0.16995	0.028883	85.5637	1	85.5637
WT HFHC M2	0.3609	0.25045	0.11045	0.0121992	37.1219	1	37.1219
WT HFHC M3	0.3325	0.2357	0.0968	0.00937024	28.9269	1	28.9269
WT HFHC M4	0.3701	0.2357	0.1344	0.0180634	54.1325	1	54.1325
Cholesterol in serum									t` test	P value	P value summary	Significantly different (P < 0.05)?
	OD value	Sample-blank	Calibration-blank	Cholesterol(mmol/L)	Dilution factor	Cholesterol(mmol/L)			WT NCD VS WT HFD	<0.001	***	Yes
WT NCD M1	0.1431	0.09725	0.20925	2.40278	1	2.40278
WT NCD M2	0.1674	0.12155	0.20925	3.00317	1	3.00317
WT NCD M3	0.1654	0.11955	0.20925	2.95376	1	2.95376
WT NCD M4	0.1549	0.10905	0.20925	2.69433	1	2.69433
WT HFHC M1	0.2622	0.2163	0.20955	5.33654	1	5.33654
WT HFHC M2	0.25	0.2041	0.20955	5.03554	1	5.03554
WT HFHC M3	0.2664	0.2205	0.20955	5.44016	1	5.44016
WT HFHC M4	0.2705	0.2246	0.20955	5.54131	1	5.54131
Triglyceride in serum									t` test	P value	P value summary	Significantly different (P < 0.05)?
	OD value	Sample-blank	Calibration-blank	Triglyceride(mmol/L)	Dilution factor	Triglyceride(mmol/L)			WT NCD VS WT HFD	0.6713	ns	No
WT NCD M1	0.1399	0.0785	0.10785	1.64497	1	1.64497
WT NCD M2	0.1482	0.0868	0.10785	1.8189	1	1.8189
WT NCD M3	0.1329	0.0715	0.10785	1.49828	1	1.49828
WT NCD M4	0.1139	0.0525	0.10785	1.10014	1	1.10014
WT HFHC M1	0.1536	0.0721	0.08595	1.89582	1	1.89582
WT HFHC M2	0.1657	0.0842	0.08595	2.21398	1	2.21398
WT HFHC M3	0.1213	0.0398	0.08595	1.04652	1	1.04652
WT HFHC M4	0.1362	0.0547	0.08595	1.4383	1	1.4383
Cholesterol in liver									t` test	P value	P value summary	Significantly different (P < 0.05)?
	OD value	Sample-blank	Calibration-blank	Cholesterol(mmol/L)	Dilution factor	Cholesterol(mmol/L)	Cholesterol/(W/V)		WT NCD VS WT HFD	0.001	**	Yes
WT NCD M1	0.07215	0.0175	0.1728	0.523582	1	0.523582	0.00523582
WT NCD M2	0.0709	0.01625	0.1728	0.486183	1	0.486183	0.00486183
WT NCD M3	0.073	0.01835	0.1728	0.549013	1	0.549013	0.00549013
WT NCD M4	0.0737	0.01905	0.1728	0.569957	1	0.569957	0.00569957
WT HFHC M1	0.1657	0.11105	0.1728	3.3225	1	3.3225	0.033225
WT HFHC M2	0.1469	0.09225	0.1728	2.76003	1	2.76003	0.0276003
WT HFHC M3	0.1145	0.05985	0.1728	1.79065	1	1.79065	0.0179065
WT HFHC M4	0.1607	0.10605	0.1728	3.17291	1	3.17291	0.0317291
Triglyceride in liver									t` test	P value	P value summary	Significantly different (P < 0.05)?
	OD value	Sample-blank	Calibration-blank	Triglyceride(mmol/L)	Dilution factor	Triglyceride(mmol/L)	Triglyceride/(W/V)		WT NCD VS WT HFD	0.02	*	Yes
WT NCD M1	0.1974	0.1411	0.1757	1.81495	1	1.81495	0.0181495
WT NCD M2	0.1815	0.1252	0.1757	1.61043	1	1.61043	0.0161043
WT NCD M3	0.1656	0.1093	0.1757	1.40591	1	1.40591	0.0140591
WT NCD M4	0.168	0.1117	0.1757	1.43678	1	1.43678	0.0143678
WT HFHC M1	0.7968	0.7405	0.1757	9.52493	1	9.52493	0.0952493
WT HFHC M2	0.3718	0.3155	0.1757	4.05822	1	4.05822	0.0405822
WT HFHC M3	0.3555	0.2992	0.1757	3.84856	1	3.84856	0.0384856
WT HFHC M4	0.4762	0.4199	0.1757	5.4011	1	5.4011	0.054011
