# Supplementary material for: Hyperactivated glycolysis drives spatially patterned Kupffer cell depletion in MASLD
Source: eLife. 2026 May 26;14:RP109206. doi: 10.7554/eLife.109206 (PMC13211875; doi:10.7554/eLife.109206)
Supplement: Figure 1—figure supplement 2—source data 1. [file elife-109206-fig1-figsupp2-data1.xlsx]

## Sheet: Figure S2A
	Cl-Caspsae3+ cells	Clec4f+ cells	Cl-Casp 3+cells/Clec4f+ cells(%)	Mean of Cl-Casp 3+cells/Clec4f+ cells(%)		One-way analysis of variance (ANOVA)	P value	P value summary	Significantly different (P < 0.05)?
WT HFHC 0w M1	0	13	0	2.05128		WT HFHC 0w VS WT HFHC 4w	<0.001	***	Yes
	0	12	0			WT HFHC 0w VS WT HFHC 16w	<0.001	***	Yes
	1	15	6.66667			WT HFHC 4w VS WT HFHC 16w	<0.001	***	Yes
	1	13	7.69231
	0	14	0
	0	15	0
	0	11	0
WT HFHC 0w M2	0	12	0	2.27273
	1	11	9.09091
	0	17	0
	0	11	0
WT HFHC 0w M3	0	11	0	0
	0	10	0
	0	12	0
	0	9	0
WT HFHC 0w M4	0	10	0	1.92308
	0	13	0
	0	10	0
	1	13	7.69231
WT HFHC 4w M1	3	10	30	20.4396
	3	15	20
	3	13	23.0769
	3	14	21.4286
	1	13	7.69231
WT HFHC 4w M2	2	12	16.6667	15.7118
	2	13	15.3846
	2	9	22.2222
	1	10	10
	1	7	14.2857
WT HFHC 4w M3	2	7	28.5714	20.3983
	2	12	16.6667
	1	10	10
	2	7	28.5714
	2	11	18.1818
WT HFHC 4w M4	2	10	20	16.7262
	1	12	8.33333
	1	10	10
	2	7	28.5714
WT HFHC 16w M1	4	9	44.4444	41.5344
	3	7	42.8571
	2	7	28.5714
	3	6	50
	2	6	33.3333
	2	4	50
WT HFHC 16w M2	3	4	75	48.7599
	2	6	33.3333
	4	9	44.4444
	4	5	80
	4	9	44.4444
	3	7	42.8571
	2	10	20
	4	8	50
WT HFHC 16w M3	4	9	44.4444	42.7489
	5	9	55.5556
	4	11	36.3636
	3	11	27.2727
	5	10	50
	3	7	42.8571
WT HFHC 16w M4	3	9	33.3333	32.3377
	3	10	30
	3	9	33.3333
	2	5	40
	2	6	33.3333
	4	11	36.3636
	2	10	20

## Sheet: Figure S2C
Group	Number of MoMFs/g liver(105)	Number of MoMFs/liver(105)			One-way analysis of variance (ANOVA)	P value	P value summary	Significantly different (P < 0.05)?
HFHC WT 0W M1	1.98347	2.55868		Number of MoMFs/g liver(105)	WT HFHC 0w VS WT HFHC 4w	0.166	ns	No
HFHC WT 0W M2	3.71586	4.38472			WT HFHC 0w VS WT HFHC 16w	0.001	**	Yes
HFHC WT 0W M3	2.61803	3.0631			WT HFHC 4w VS WT HFHC 16w	0.011	*	Yes
HFHC WT 0W M4	1.98289	2.12169		Number of MoMFs/liver(105)	WT HFHC 0w VS WT HFHC 4w	0.142	ns	No
HFHC WT 0W M5	0.999575	1.30944			WT HFHC 0w VS WT HFHC 16w	0.002	**	Yes
HFHC WT 4W M1	5.91165	6.73928			WT HFHC 4w VS WT HFHC 16w	0.029	*	Yes
HFHC WT 4W M2	3.28118	5.11863
HFHC WT 4W M3	3.46257	3.53182
HFHC WT 4W M4	3.84096	4.03301
HFHC WT 4W M5	4.13017	6.31916
HFHC WT 16W M1	6.69266	6.5588
HFHC WT 16W M2	13.2923	15.552
HFHC WT 16W M3	6.07021	6.85934
HFHC WT 16W M4	6.6902	8.22895

## Sheet: Figure S2D
	Ki67+ TIM4+ TUNEL+ cells	TIM4+ TUNEL+ cells	Ki67+ TIM4+ TUNEL+/TIM4+ TUNEL+ cells(%)	Ki67+ TIM4+ TUNEL+/TIM4+ TUNEL+ cells(%)		One-way analysis of variance (ANOVA)	P value	P value summary	Significantly different (P < 0.05)?			Ki67+ TIM4+ cells	TIM4+ cells	Ki67+ TIM4+/TIM4+ cells	Ki67+ TIM4+/TIM4+ cells		One-way analysis of variance (ANOVA)	P value	P value summary	Significantly different (P < 0.05)?
WT HFHC 0w M1	0	0	0	0		WT HFHC 0w VS WT HFHC 4w	0.449	ns	No		WT HFHC 0w M1	1	8	12.5	8.74542		WT HFHC 0w VS WT HFHC 4w	0.77	ns	No
	0	0	0			WT HFHC 0w VS WT HFHC 16w	0.028	*	Yes			0	12	0			WT HFHC 0w VS WT HFHC 16w	0.502	ns	No
	0	1	0			WT HFHC 4w VS WT HFHC 16w	0.103	ns	No			1	12	8.33333			WT HFHC 4w VS WT HFHC 16w	0.699	ns	No
	0	0	0									1	8	12.5
	0	0	0									0	10	0
	0	0	0									2	13	15.3846
	0	0	0									2	16	12.5
WT HFHC 0w M2	0	0	0	0							WT HFHC 0w M2	1	19	5.26316	0.657895
	0	0	0									0	13	0
	0	0	0									0	17	0
	0	0	0									0	15	0
	0	0	0									0	16	0
	0	0	0									0	15	0
	0	0	0									0	8	0
	0	0	0									0	18	0
WT HFHC 0w M3	0	0	0	0							WT HFHC 0w M3	1	13	7.69231	4.40524
	0	0	0									0	8	0
	0	0	0									2	14	14.2857
	0	0	0									0	8	0
	0	0	0									0	20	0
	0	0	0									0	17	0
	0	0	0									2	19	10.5263
	0	0	0									1	14	7.14286
	0	0	0									1	0	0
WT HFHC 0w M4	0	1	0	0							WT HFHC 0w M4	1	12	8.33333	7.49563
	0	0	0									0	11	0
	0	1	0									1	13	7.69231
	0	0	0									1	11	9.09091
	0	0	0									0	9	0
	0	0	0									2	12	16.6667
	0	0	0									2	11	18.1818
	0	0	0									0	12	0
WT HFHC 4w M1	0	2	0	13.1944							WT HFHC 4w M1	2	8	25	18.2234
	1	8	12.5									1	13	7.69231
	1	6	16.6667									2	8	25
	2	8	25									3	13	23.0769
	1	4	25									2	7	28.5714
	0	6	0									0	12	0
WT HFHC 4w M2	0	3	0	0							WT HFHC 4w M2	0	7	0	0
	0	1	0									0	4	0
	0	3	0									0	7	0
	0	5	0									0	8	0
	0	10	0									0	14	0
WT HFHC 4w M3	0	2	0	0							WT HFHC 4w M3	0	7	0	3.52092
	0	6	0									1	18	5.55556
	0	5	0									1	10	10
	0	5	0									0	13	0
	0	1	0									0	7	0
	0	2	0									0	8	0
	0	2	0									1	11	9.09091
WT HFHC 4w M4	0	3	0	3.125							WT HFHC 4w M4	0	10	0	3.96374
	0	2	0									1	11	9.09091
	0	4	0									0	11	0
	0	3	0									0	7	0
	0	7	0									1	12	8.33333
	0	3	0									0	8	0
	0	3	0									0	6	0
	1	4	25									1	7	14.2857
WT HFHC 16w M1	0	5	0	4.44444							WT HFHC 16w M1	0	7	0	7.46261
	1	5	20									1	12	8.33333
	0	4	0									0	7	0
	0	6	0									1	12	8.33333
	0	5	0									0	11	0
	0	3	0									0	6	0
	0	6	0									4	16	25
	0	3	0									0	9	0
	0	4	0									0	7	0
	0	3	0									1	8	12.5
	1	6	16.6667									2	10	20
	1	6	16.6667									2	13	15.3846
WT HFHC 16w M2	2	4	50	22.2222							WT HFHC 16w M2	2	13	15.3846	8.85226
	2	3	66.6667									2	6	33.3333
	1	3	33.3333									1	6	16.6667
	1	2	50									1	7	14.2857
	0	4	0									0	8	0
	0	1	0									0	2	0
	0	6	0									0	12	0
	0	3	0									0	6	0
	0	3	0									0	6	0
WT HFHC 16w M3	0	5	0	3.46154							WT HFHC 16w M3	0	10	0	5.93054
	1	5	20									1	12	8.33333
	0	3	0									0	6	0
	0	3	0									2	7	28.5714
	0	2	0									0	8	0
	0	5	0									0	6	0
	1	4	25									1	8	12.5
	0	7	0									2	10	20
	0	4	0									1	13	7.69231
	0	2	0									0	8	0
	0	4	0									0	7	0
	0	3	0									0	10	0
	0	5	0									0	5	0
WT HFHC 16w M4	0	3	0	23.6111							WT HFHC 16w M4	0	6	0	9.30556
	1	2	50									1	6	16.6667
	1	2	50									1	5	20
	0	2	0									0	4	0
	0	4	0									0	5	0
	0	5	0									0	5	0
	1	3	33.3333									1	12	8.33333
	1	2	50									1	6	16.6667
	0	2	0									0	8	0
	0	2	0									0	5	0
	0	2	0									0	5	0
	3	3	100									3	6	50
