# Supplementary material for: Hyperactivated glycolysis drives spatially patterned Kupffer cell depletion in MASLD
Source: eLife. 2026 May 26;14:RP109206. doi: 10.7554/eLife.109206 (PMC13211875; doi:10.7554/eLife.109206)
Supplement: Figure 1—source data 1. [file elife-109206-fig1-data1.xlsx]

## Sheet: Figure 1B
Group	TIM4+	TIM4+TUNEL+	TIM4+TUNEL+/TIM4+	TIM4+ Average	TIM4+TUNEL+/TIM4+Average				One-way analysis of variance (ANOVA)	P value	P value summary	Significantly different (P < 0.05)?
HFHC WT 0W M1	47	0	0	60.25	1.17424			TIM4+ Average	WT HFHC 0w VS WT HFHC 4w	<0.001	***	Yes
	60	1	1.66667						WT HFHC 0w VS WT HFHC 16w	<0.001	***	Yes
	68	0	0						WT HFHC 4w VS WT HFHC 16w	0.001	**	Yes
	66	2	3.0303
HFHC WT 0W M2	65	0	0	61.25	0.806452				One-way analysis of variance (ANOVA)	P value	P value summary	Significantly different (P < 0.05)?
	64	0	0					TIM4+TUNEL+/TIM4+Average	WT HFHC 0w VS WT HFHC 4w	<0.001	***	Yes
	62	1	1.6129						WT HFHC 0w VS WT HFHC 16w	<0.001	***	Yes
	54	0	0						WT HFHC 4w VS WT HFHC 16w	<0.001	***	Yes
HFHC WT 0W M3	62	1	1.6129	56.8	1.31306
	53	0	0
	50	1	2
	61	1	1.63934
	58	0
HFHC WT 0W M4	53	0	0	63	0.512821
	71	0	0
	65	1	1.53846
HFHC WT 4W M1	33	9	27.2727	41.6	25.7272
	43	9	20.9302
	51	7	13.7255
	40	14	35
	41	13	31.7073
HFHC WT 4W M2	50	8	16	42.4	18.0126
	49	7	14.2857
	39	8	20.5128
	40	11	27.5
	34	4	11.7647
HFHC WT 4W M3	46	20	43.4783	50	37.7369
	51	21	41.1765
	62	25	40.3226
	41	13	31.7073
	50	16	32
HFHC WT 4W M4	48	16	33.3333	46.3333	29.5723
	47	15	31.9149
	46	14	30.4348
	42	13	30.9524
	50	15	30
	45	11	24.4444
	54	14	25.9259
HFHC WT 16W M1	29	15	51.7241	30.6667	52.7643
	28	15	53.5714
	37	19	51.3514
	31	19	61.2903
	22	11	50
	37	18	48.6486
WT HFHC 16w M2	35	21	60	30.5	56.2242
	29	17	58.6207
	31	18	58.0645
	27	16	59.2593
	32	17	53.125
	29	14	48.2759
WT HFHC 16w M3	31	17	54.8387	28.25	58.0094
	23	15	65.2174
	28	16	57.1429
	31	17	54.8387
WT HFHC 16w M4	35	18	51.4286	39.6	50.2756
	41	21	51.2195
	42	21	50
	45	20	44.4444
	35	19	54.2857

## Sheet: Figure 1D
Group	Number of KCs/g liver(105)	Number of KCs/liver(105)			One-way analysis of variance (ANOVA)	P value	P value summary	Significantly different (P < 0.05)?
HFHC WT 0W M1	8.234	10.621		Number of KCs/g liver(105)	WT HFHC 0w VS WT HFHC 4w	0.025	*	Yes
HFHC WT 0W M2	8.357	9.861			WT HFHC 0w VS WT HFHC 16w	0.003	**	Yes
HFHC WT 0W M3	10.837	12.679			WT HFHC 4w VS WT HFHC 16w	0.183	ns	No
HFHC WT 0W M4	13.914	14.888		Number of KCs/liver(105)	WT HFHC 0w VS WT HFHC 4w	0.038	*	Yes
HFHC WT 0W M5	15.65	20.502			WT HFHC 0w VS WT HFHC 16w	0.002	**	Yes
HFHC WT 4W M1	6.813	7.767			WT HFHC 4w VS WT HFHC 16w	0.123	ns	No
HFHC WT 4W M2	5.984	9.335
HFHC WT 4W M3	7.306	7.452
HFHC WT 4W M4	9.259	9.722
HFHC WT 4W M5	7.217	11.042
HFHC WT 16W M1	1.629	4.716
HFHC WT 16W M2	4.812	1.906
HFHC WT 16W M3	7.363	8.32
HFHC WT 16W M4	5.989	7.366

## Sheet: Figure 1E
	TIM4+	TIM4+TUNEL+	TIM4+TUNEL+/TIM4+	TIM4+TUNEL+/TIM4+Average		t` test	P value	P value summary	Significantly different (P < 0.05)?
WT HFHC 0w M1	55	0	0	0		WT NCD VS WT HFD	<0.001	***	Yes
	63	0	0
	75	0	0
	57	0	0
WT HFHC 0w M2	66	0	0	0.735294
	63	0	0
	66	0	0
	68	2	2.94118
WT HFHC 0w M3	62	0	0	0.628931
	53	1	1.88679
	54	0	0
WT HFHC 0w M4	62	0	0	0.363636
	57	0	0
	56	0	0
	60	0	0
	55	1	1.81818
WT HFD 20w M1	23	14	60.8696	61.8319
	15	11	73.3333
	29	17	58.6207
	15	9	60
	25	15	60
	20	13	65
	20	11	55
WT HFD 20w M2	18	9	50	52.6687
	21	11	52.381
	30	16	53.3333
	27	18	66.6667
	35	16	45.7143
	48	23	47.9167
WT HFD 20w M3	47	33	70.2128	58.1991
	29	17	58.6207
	36	18	50
	37	23	62.1622
	32	16	50
WT HFD 20w M4	11	8	72.7273	63.0273
	9	7	77.7778
	17	8	47.0588
	11	6	54.5455

## Sheet: Figure 1F
	TIM4+	TIM4+TUNEL+	TIM4+TUNEL+/TIM4+	TIM4+TUNEL+/TIM4+Average		t` test	P value	P value summary	Significantly different (P < 0.05)?
WT HFHC 0w M1	55	0	0	0		WT NCD VS WT MCD	<0.001	***	Yes
	63	0	0
	75	0	0
	57	0	0
WT HFHC 0w M2	66	0	0	0.735294
	63	0	0
	66	0	0
	68	2	2.94118
WT HFHC 0w M3	62	0	0	0.628931
	53	1	1.88679
	54	0	0
WT HFHC 0w M4	62	0	0	0.363636
	57	0	0
	56	0	0
	60	0	0
	55	1	1.81818
WT MCD 6w M1	23	9	39.1304	60.7494
	16	8	50
	19	8	42.1053
	23	18	78.2609
	12	9	75
	10	8	80
WT MCD 6w M2	24	11	45.8333	43.7445
	26	10	38.4615
	35	15	42.8571
	23	11	47.8261
WT MCD 6w M3	37	18	48.6486	51.4786
	36	15	41.6667
	35	19	54.2857
	29	14	48.2759
	31	20	64.5161
WT MCD 6w M4	36	16	44.4444	50.5286
	21	12	57.1429
	30	19	63.3333
	25	14	56
	33	13	39.3939
	35	15	42.8571
