# Supplementary material for: Hyperactivated glycolysis drives spatially patterned Kupffer cell depletion in MASLD
Source: eLife. 2026 May 26;14:RP109206. doi: 10.7554/eLife.109206 (PMC13211875; doi:10.7554/eLife.109206)
Supplement: Figure 2—source data 1. [file elife-109206-fig2-data1.xlsx]

## Sheet: Figure A
Group	HNF4a+	HNF4a+TUNEL+	HNF4a+TUNEL+/HNF4a+	HNF4a+TUNEL+/HNF4a+Average		One-way analysis of variance (ANOVA)	P value	P value summary	Significantly different (P < 0.05)?
HFHC 0W M1	342	0	0	0		WT HFHC 0w VS WT HFHC 4w	0.124	ns	No
	435	0	0			WT HFHC 0w VS WT HFHC 16w	<0.001	***	Yes
	432	0	0			WT HFHC 4w VS WT HFHC 16w	<0.001	***	Yes
	462	0	0
	480	0	0
HFHC 0W M2	387	0	0	0
	405	0	0
	498	0	0
	417	0	0
	408	0	0
HFHC 0W M3	390	0	0	0
	372	0	0
	438	0	0
	355	0	0
	344	0	0
HFHC 0W M4	381	0	0	0
	382	0	0
	440	0	0
	444	0	0
	397	0	0
HFHC 4W M1	558	13	2.32975	2.51847
	468	12	2.5641
	394	14	3.5533
	485	10	2.06186
	432	9	2.08333
HFHC 4W M2	453	8	1.766	1.67122
	435	4	0.91954
	472	10	2.11864
	474	4	0.843882
	594	21	3.53535
	487	10	0.843882
HFHC 4W M3	364	2	0.549451	0.287826
	460	0	0
	456	0	0
	506	0	0
	562	5	0.88968
HFHC 4W M4	458	8	1.74672	1.81957
	456	12	2.63158
	467	9	1.92719
	514	5	0.972763
HFHC 16W M1	259	12	4.6332	6.28888
	262	16	6.10687
	264	13	4.92424
	247	16	6.47773
	215	20	9.30233
HFHC 16W M2	383	25	6.52742	8.16142
	307	18	5.86319
	347	39	11.2392
	380	26	6.84211
	358	37	10.3352
HFHC 16W M3	430	26	6.04651	6.27735
	468	28	5.98291
	434	27	6.2212
	373	33	8.84718
	443	19	4.28894
HFHC 16W M4	259	41	15.8301	10.6569
	351	35	9.97151
	324	29	8.95062
	223	15	6.72646
	288	34	11.8056

## Sheet: Figure B
Group	Desmin+	Desmin+TUNEL+	Desmin+TUNEL+/Desmin+	Desmin+TUNEL+/Desmin+Average		One-way analysis of variance (ANOVA)	P value	P value summary	Significantly different (P < 0.05)?
HFHC 0W M1	78	0	0	0.445045		WT HFHC 0w VS WT HFHC 4w	<0.001	***	Yes
	88	0	0			WT HFHC 0w VS WT HFHC 16w	<0.001	***	Yes
	70	0	0			WT HFHC 4w VS WT HFHC 16w	<0.001	***	Yes
	83	1	1.20482
	98	1	1.02041
HFHC 0W M2	84	0	0	0
	86	0	0
	78	0	0
	88	0	0
	59	0	0
HFHC 0W M3	75	0	0	0.766151
	78	1	1.28205
	77	1	1.2987
	65	0	0
	80	1	1.25
HFHC 0W M4	49	0	0	0
	60	0	0
	55	0	0
	50	0	0
	54	0	0
HFHC 4W M1	91	12	13.1868	10.266
	104	14	13.4615
	98	7	7.14286
	110	8	7.27273
HFHC 4W M2	102	7	6.86275	7.71294
	107	8	7.47664
	89	9	10.1124
	125	8	6.4
HFHC 4W M3	111	4	3.6036	13.7305
	97	7	7.21649
	112	23	20.5357
	101	21	20.7921
	103	17	16.5049
HFHC 4W M4	98	17	17.3469	11.8403
	102	11	10.7843
	85	10	11.7647
	92	12	13.0435
	110	13	11.8182
	107	10	9.34579
	104	12	11.5385
	96	12	12.5
	95	8	8.42105
HFHC 16W M1	96	17	17.7083	20.2067
	77	20	25.974
	98	19	19.3878
	90	17	18.8889
	86	15	17.4419
	87	19	21.8391
HFHC 16W M2	92	27	29.3478	21.4537
	90	16	17.7778
	98	20	20.4082
	94	17	18.0851
	97	21	21.6495
HFHC 16W M3	101	20	19.802	20.2198
	98	18	18.3673
	108	22	20.3704
	96	18	18.75
	105	25	23.8095
HFHC 16W M4	77	15	19.4805	21.792
	84	13	15.4762
	71	20	28.169
	89	18	20.2247
	82	21	25.6098

## Sheet: Figure C
Group	IBA1+	IBA1+TUNEL+	IBA1+TUNEL+/IBA1+	IBA1+TUNEL+/IBA1+ Average		One-way analysis of variance (ANOVA)	P value	P value summary	Significantly different (P < 0.05)?
HFHC 0W M1	97	2	2.06186	1.15934		WT HFHC 0w VS WT HFHC 4w	<0.001	***	Yes
	93	0	0			WT HFHC 0w VS WT HFHC 16w	<0.001	***	Yes
	84	1	1.19048			WT HFHC 4w VS WT HFHC 16w	<0.001	***	Yes
	72	2	2.77778
	91	0	0
	108	1	0.925926
HFHC 0W M2	114	1	0.877193	0.562115
	122	1	0.819672
	104	1	0.961538
	112	0	0
	140	1	0.714286
	94	0	0
HFHC 0W M3	85	0	0	0.895355
	97	2	2.06186
	88	1	1.13636
	105	0	0
	92	2	2.17391
	93	0	0
HFHC 0W M4	97	1	1.03093	0.865526
	91	3	3.2967
	107	0	0
	101	0	0
	99	0	0
HFHC 4W M1	94	28	29.7872	24.6208
	78	20	25.641
	73	15	20.5479
	83	19	22.8916
	87	21	24.1379
	89	22	24.7191
HFHC 4W M2	99	20	20.202	19.8874
	101	16	15.8416
	86	21	24.4186
	89	18	20.2247
	96	18	18.75
HFHC 4W M3	79	8	10.1266	11.5251
	98	13	13.2653
	64	9	14.0625
	87	8	9.1954
	82	9	10.9756
HFHC 4W M4	86	6	6.97674	17.453
	81	9	11.1111
	73	10	13.6986
	79	19	24.0506
	82	23	28.0488
	99	21	21.2121
	82	14	17.0732
HFHC 16W M1	96	35	36.4583	32.0812
	79	21	26.5823
	68	23	33.8235
	89	28	31.4607
HFHC 16W M2	103	33	32.0388	28.045
	85	23	27.0588
	91	25	27.4725
	82	21	25.6098
HFHC 16W M3	89	17	19.1011	25.672
	91	28	30.7692
	82	27	32.9268
	77	14	18.1818
	84	23	27.381
HFHC 16W M4	80	21	26.25	25.4717
	67	13	19.403
	62	19	30.6452
	87	22	25.2874
	97	25	25.7732

## Sheet: Figure D
Group	Zone1 PV TIM4+ KCs	Zone1 PV TIM4+TUNEL+ KCs	Zone1 PV TIM4+TUNEL+/TIM4+ KCs	Zone1 PV TIM4+TUNEL+ KCs Average	Zone1 PV TIM4+TUNEL+ KCs/TIM4+ KCs Average	Zone2 TIM4+ KCs	Zone2 TIM4+TUNEL+ KCs	Zone2 TIM4+TUNEL+ KCs/TIM4+ KCs	Zone2 TIM4+TUNEL+ KCs Average	Zone2 TIM4+TUNEL+ KCs/TIM4+ KCs Average	Zone3 CV TIM4+	Zone3 CV TIM4+TUNEL+	Zone3 CV TIM4+TUNEL+/TIM4+	Zone3 CV TIM4+TUNEL+ Average	Zone3 CV TIM4+TUNEL+/TIM4+ Average			One-way analysis of variance (ANOVA)	P value	P value summary	Significantly different (P < 0.05)?
HFHC 0W M1	12	0	0	0	0	13	0	0	0	0	13	0	0	0	0		TIM4+TUNEL+ KCs	WT HFHC 0w Zone1 VS WT HFHC 0w Zone2	0.055	ns	No
	13	0	0			12	0	0			12	0	0					WT HFHC 0w Zone1 VS WT HFHC 0w Zone3	0.147	ns	No
	12	0	0			14	0	0			12	0	0					WT HFHC 0w Zone2 VS WT HFHC 0w Zone3	0.587	ns	No
HFHC 0W M2	20	0	0	0	0	19	0	0	0	0	16	0	0	0	0			WT HFHC 4w Zone1 VS WT HFHC 4w Zone2	0.714	ns	No
	13	0	0			12	0	0			11	0	0					WT HFHC 4w Zone1 VS WT HFHC 4w Zone3	0.848	ns	No
	11	0	0			12	0	0			12	0	0					WT HFHC 4w Zone2 VS WT HFHC 4w Zone3	0.578	ns	No
HFHC 0W M3	13	0	0	0.333333	1.28205	14	0	0	0	0	12	0	0	0	0			WT HFHC 8w Zone1 VS WT HFHC 8w Zone2	0.071	ns	No
	18	0	0			16	0	0			13	0	0					WT HFHC 8w Zone1 VS WT HFHC 8w Zone3	0.091	ns	No
	13	1	7.69231			11	0	0			11	0	0					WT HFHC 8w Zone2 VS WT HFHC 8w Zone3	0.898	ns	No
HFHC 0W M4	13	1	7.69231	0.666667	4.29293	13	0	0	0	0	13	0	0	0.333333	0.952381			WT HFHC 16w Zone1 VS WT HFHC 16w Zone2	0.413	ns	No
	16	0	0			16	0	0			15	1	6.66667					WT HFHC 16w Zone1 VS WT HFHC 16w Zone3	0.004	**	Yes
	11	1	9.09091			10	0	0			12	0	0					WT HFHC 16w Zone2 VS WT HFHC 16w Zone3	0.026	*	Yes
HFHC 0W M5	12	0	0	0	0	12	0	0	0	0	13	0	0	0	0		TIM4+TUNEL+ KCs/TIM4+ KCs	WT HFHC 0w Zone1 VS WT HFHC 0w Zone2	0.065	ns	No
	14	0	0			15	0	0			15	0	0					WT HFHC 0w Zone1 VS WT HFHC 0w Zone3	0.107	ns	No
	15	0	0			19	0	0			17	0	0					WT HFHC 0w Zone2 VS WT HFHC 0w Zone3	0.785	ns	No
	14	0	0			13	0	0			16	0	0					WT HFHC 4w Zone1 VS WT HFHC 4w Zone2	0.656	ns	No
HFHC 0W M6	11	0	0	0.25	1.25	12	0	0	0	0	9	0	0	0	0			WT HFHC 4w Zone1 VS WT HFHC 4w Zone3	0.947	ns	No
	12	0	0			11	0	0			13	0	0					WT HFHC 4w Zone2 VS WT HFHC 4w Zone3	0.704	ns	No
	14	0	0			17	0	0			17	0	0					WT HFHC 8w Zone1 VS WT HFHC 8w Zone2	0.065	ns	No
	20	1	5			20	0	0			14	0	0					WT HFHC 8w Zone1 VS WT HFHC 8w Zone3	0.041	*	Yes
HFHC 4W M1	9	0	0	1.90909	25.9569	9	3	33.3333	2.09091	27.8916	5	0	0	0.818182	9.61039			WT HFHC 8w Zone2 VS WT HFHC 8w Zone3	0.816	ns	No
	9	3	33.3333			4	2	50			7	3	42.8571					WT HFHC 16w Zone1 VS WT HFHC 16w Zone2	0.916	ns	No
	5	1	20			9	0	0			4	0	0					WT HFHC 16w Zone1 VS WT HFHC 16w Zone3	0.141	ns	No
	6	3	50			8	2	25			7	0	0					WT HFHC 16w Zone2 VS WT HFHC 16w Zone3	0.117	ns	No
	5	0	0			8	3	37.5			5	0	0
	4	4	100			7	4	57.1429			7	3	42.8571
	17	3	17.6471			13	3	23.0769			12	0	0
	11	5	45.4545			7	4	57.1429			15	3	20
	12	0	0			11	0	0			9	0	0
	11	1	9.09091			9	1	11.1111			7	0	0
	10	1	10			8	1	12.5			7	0	0
HFHC 4W M2	13	0	0	1.22222	16.0494	11	0	0	1.77778	26.8783	7	0	0	1.22222	24.6032
	6	0	0			10	0	0			6	0	0
	4	0	0			9	1	11.1111			10	0	0
	17	0	0			13	0	0			12	0	0
	11	0	0			7	0	0			15	0	0
	9	4	44.4444			7	2	28.5714			7	3	42.8571
	6	3	50			5	4	80			4	2	50
	6	1	16.6667			9	2	22.2222			4	4	100
	9	3	33.3333			7	7	100			7	2	28.5714
HFHC 4W M3	12	1	8.33333	0.75	6.64683	17	0	0	1.25	7.8125	11	0	0	1.25	14.5833
	14	1	7.14286			8	0	0			10	0	0
	9	1	11.1111			16	5	31.25			9	3	33.3333
	8	0	0			4	0	0			8	2	25
HFHC 4W M4	18	1	5.55556	0.4	3.33333	19	1	5.26316	0.8	8.52485	7	0	0	0.4	5.55556
	8	0	0			9	1	11.1111			12	0	0
	11	0	0			16	1	6.25			6	1	16.6667
	7	0	0			5	1	20			9	1	11.1111
	9	1	11.1111			6	0	0			6	0	0
HFHC 4W M5	15	0	0	3.4	29.5397	14	2	14.2857	4.8	35.716	10	2	20	3.8	34.6154
	7	4	57.1429			8	3	37.5			7	0	0
	8	2	25			14	0	0			10	3	30
	15	4	26.6667			11	7	63.6364			13	3	23.0769
	18	7	38.8889			19	12	63.1579			11	11	100
HFHC 4W M6	9	1	11.1111	5.375	43.4235	8	1	12.5	4.625	40.4891	17	3	17.6471	4.375	39.3239
	6	0	0			11	2	18.1818			9	1	11.1111
	11	6	54.5455			9	4	44.4444			10	5	50
	22	3	13.6364			14	6	42.8571			12	7	58.3333
	21	17	80.9524			16	9	56.25			20	5	25
	10	8	80			13	7	53.8462			15	6	40
	7	4	57.1429			9	3	33.3333			6	3	50
	8	4	50			8	5	62.5			8	5	62.5
HFHC 8W M1	10	8	80	9.5	78.7917	9	6	66.6667	8.3	68.7843	9	2	22.2222	7.5	57.673
	6	4	66.6667			4	2	50			10	4	40
	8	4	50			6	2	33.3333			7	1	14.2857
	13	12	92.3077			17	15	88.2353			13	12	92.3077
	11	9	81.8182			10	8	80			9	8	88.8889
	5	3	60			9	2	22.2222			7	3	42.8571
	9	8	88.8889			13	11	84.6154			11	7	63.6364
	17	15	88.2353			11	10	90.9091			19	16	84.2105
	15	12	80			11	10	90.9091			13	9	69.2308
	20	20	100			21	17	80.9524			22	13	59.0909
HFHC 8W M2	17	15	88.2353	8.875	72.5574	23	8	34.7826	7.125	66.5461	18	13	72.2222	8.125	73.4482
	9	3	33.3333			11	2	18.1818			10	6	60
	17	16	94.1176			14	11	78.5714			10	10	100
	11	3	27.2727			10	5	50			15	11	73.3333
	16	14	87.5			10	10	100			19	5	26.3158
	5	5	100			5	4	80			7	5	71.4286
	10	9	90			12	10	83.3333			10	7	70
	10	6	60			8	7	87.5			7	8	114.286
HFHC 8W M3	6	5	83.3333	5.42857	69.657	7	1	14.2857	2.85714	29.2517	6	1	16.6667	3.57143	37.534
	5	4	80			5	0	0			7	3	42.8571
	7	7	100			9	3	33.3333			8	1	12.5
	11	8	72.7273			6	2	33.3333			6	3	50
	5	3	60			12	4	33.3333			10	3	30
	13	8	61.5385			18	6	33.3333			14	12	85.7143
	10	3	30			7	4	57.1429			8	2	25
HFHC 8W M4	7	2	28.5714	5.83333	44.2125	6	0	0	4.5	43.3059	9	2	22.2222	4.16667	34.7172
	7	3	42.8571			6	5	83.3333			9	2	22.2222
	6	2	33.3333			7	4	57.1429			6	4	66.6667
	26	14	53.8462			30	11	36.6667			25	13	52
	12	8	66.6667			8	6	75			8	3	37.5
	15	6	40			13	1	7.69231			13	1	7.69231
HFHC 8W M5	6	2	33.3333	7.625	77.5974	9	4	44.4444	5.375	52.2727	10	1	10	5.625	49.2566
	11	9	81.8182			12	6	50			11	7	63.6364
	11	10	90.9091			9	5	55.5556			9	6	66.6667
	9	9	100			11	2	18.1818			4	2	50
	6	4	66.6667			7	2	28.5714			8	2	25
	9	9	100			14	13	92.8571			20	17	85
	11	10	90.9091			7	7	100			6	3	50
	14	8	57.1429			14	4	28.5714			16	7	43.75
HFHC 8W M6	10	9	90	8.75	76.1368	8	8	100	6.375	61.166	10	7	70	7.75	69.953
	3	1	33.3333			5	0	0			6	1	16.6667
	5	4	80			6	3	50			7	2	28.5714
	25	18	72			17	13	76.4706			18	15	83.3333
	6	6	100			7	3	42.8571			7	5	71.4286
	18	17	94.4444			15	14	93.3333			17	15	88.2353
	9	7	77.7778			6	4	66.6667			9	8	88.8889
	13	8	61.5385			10	6	60			8	9	112.5
HFHC 8W M7	11	9	81.8182	7.54545	63.0972	10	7	70	6.63636	59.2792	8	5	62.5	5.27273	45.8263
	10	8	80			9	6	66.6667			11	7	63.6364
	11	8	72.7273			8	4	50			9	2	22.2222
	15	12	80			16	11	68.75			21	15	71.4286
	10	7	70			7	5	71.4286			8	2	25
	20	8	40			11	9	81.8182			19	6	31.5789
	10	6	60			12	2	16.6667			7	4	57.1429
	10	6	60			11	8	72.7273			9	7	77.7778
	7	3	42.8571			8	4	50			8	1	12.5
	15	12	80			23	8	34.7826			22	3	13.6364
	15	4	26.6667			13	9	69.2308			9	6	66.6667
HFHC 16W M1	11	8	72.7273	7.57143	66.0107	16	3	18.75	5.57143	49.5781	25	2	8	4.71429	62.1044
	9	5	55.5556			12	3	25			5	4	80
	8	4	50			6	5	83.3333			5	2	40
	8	5	62.5			7	4	57.1429			2	2	100
	10	5	50			16	8	50			16	6	37.5
	11	9	81.8182			13	6	46.1538			8	8	100
	19	17	89.4737			15	10	66.6667			13	9	69.2308
HFHC 16W M2	9	7	77.7778	8	67.1551	10	6	60	9	65.8794	15	14	93.3333	6.28571	53.7725
	9	4	44.4444			14	4	28.5714			9	0	0
	10	5	50			4	4	100			5	5	100
	14	7	50			12	6	50			14	3	21.4286
	9	5	55.5556			13	6	46.1538			9	2	22.2222
	16	16	100			23	20	86.9565			16	10	62.5
	13	12	92.3077			19	17	89.4737			13	10	76.9231
HFHC 16W M3	18	16	88.8889	8.63636	63.7312	27	14	51.8519	8.36364	62.2394	12	12	100	6.36364	51.3301
	21	7	33.3333			10	10	100			10	5	50
	9	7	77.7778			13	10	76.9231			8	6	75
	17	11	64.7059			24	12	50			21	10	47.619
	13	7	53.8462			9	5	55.5556			10	6	60
	24	13	54.1667			25	10	40			26	12	46.1538
	10	9	90			11	7	63.6364			11	7	63.6364
	7	7	100			9	9	100			9	8	88.8889
	12	8	66.6667			12	10	83.3333			15	2	13.3333
	11	4	36.3636			6	2	33.3333			2	0	0
	17	6	35.2941			10	3	30			10	2	20
HFHC 16W M4	17	4	23.5294	5.875	49.9718	11	3	27.2727	4.5	44.4607	15	2	13.3333	2.375	26.6531
	21	7	33.3333			18	2	11.1111			11	1	9.09091
	6	3	50			9	2	22.2222			7	1	14.2857
	12	10	83.3333			9	8	88.8889			8	2	25
	11	4	36.3636			14	5	35.7143			11	2	18.1818
	11	11	100			10	8	80			8	6	75
	8	3	37.5			7	4	57.1429			6	2	33.3333
	14	5	35.7143			12	4	33.3333			12	3	25
HFHC 16W M5	12	8	66.6667	8	59.1931	18	8	44.4444	7	57.6119	15	5	33.3333	4	37.5458
	27	5	18.5185			19	9	47.3684			13	6	46.1538
	10	5	50			9	5	55.5556			8	4	50
	13	8	61.5385			9	6	66.6667			12	4	33.3333
	12	11	91.6667			19	8	42.1053			15	5	33.3333
	16	14	87.5			10	9	90			6	4	66.6667
	13	5	38.4615			7	4	57.1429			5	0	0
HFHC 16W M6	27	8	29.6296	6.71429	53.8793	11	7	63.6364	5.71429	62.7789	14	5	35.7143	4.85714	50.7543
	15	4	26.6667			6	5	83.3333			6	4	66.6667
	15	5	33.3333			11	3	27.2727			11	3	27.2727
	10	6	60			22	8	36.3636			12	7	58.3333
	12	9	75			7	7	100			7	6	85.7143
	11	7	63.6364			13	7	53.8462			19	6	31.5789
	9	8	88.8889			4	3	75			6	3	50
HFHC 16W M7	13	8	61.5385	5.7	50.8238	6	6	100	6	72.4673	5	4	80	5	67.4176
	8	4	50			3	3	100			5	3	60
	10	5	50			5	4	80			7	6	85.7143
	13	4	30.7692			4	4	100			6	2	33.3333
	11	5	45.4545			5	5	100			7	7	100
	10	8	80			15	12	80			9	6	66.6667
	24	2	8.33333			14	5	35.7143			6	4	66.6667
	7	4	57.1429			15	2	13.3333			13	5	38.4615
	4	2	50			8	6	75			5	3	60
	20	15	75			32	13	40.625			12	10	83.3333
