# Supplementary material for: Hyperactivated glycolysis drives spatially patterned Kupffer cell depletion in MASLD
Source: eLife. 2026 May 26;14:RP109206. doi: 10.7554/eLife.109206 (PMC13211875; doi:10.7554/eLife.109206)
Supplement: Figure 3—figure supplement 1—source data 1. [file elife-109206-fig3-figsupp1-data1.xlsx]

## Sheet: Figure S1A
Gropup	TIM4+ cells	Total cells	TIM4+ cells/Total cells
1	5	5	100
2	5	6	83.3333
3	5	6	83.3333
4	5	5	100
5	7	8	87.5
6	7	7	100

## Sheet: Figure S1B
Group		Slc2a1	18s	dCt	2^-ddCt	average	normalize		One-way analysis of variance (ANOVA)	P value	P value summary	Significantly different (P < 0.05)?
WT HFHC 0W	m1	31.112	12.8106	18.3014	3.09551e-06	6.26732e-06	0.493913		WT HFHC 0w VS WT HFHC 4w	0.659	ns	No
	m2	29.8172	12.9949	16.8224	8.62908e-06		1.37684		WT HFHC 0w VS WT HFHC 8w	0.002	**	Yes
	m3	29.0763	11.8304	17.2459	6.43384e-06		1.02657		WT HFHC 0w VS WT HFHC 16w	<0.001	***	Yes
	m4	29.15	12.0073	17.1427	6.91085e-06		1.10268		WT HFHC 4w VS WT HFHC 8w	0.004	**	Yes
WT HFHC 4W	m1	29.358	13.2157	16.1423	1.38255e-05		2.20596		WT HFHC 4w VS WT HFHC 16w	<0.001	***	Yes
	m2	30.5249	13.2606	17.2644	6.35195e-06		1.0135		WT HFHC 8w VS WT HFHC 16w	0.174	ns	No
	m3	30.3189	13.4963	16.8226	8.62794e-06		1.37666
	m4	30.4422	13.8976	16.5445	1.04615e-05		1.66922
WT HFHC 8W	m1	27.5269	12.9493	14.5775	4.08998e-05		6.52589
	m2	27.5492	13.081	14.4682	4.41195e-05		7.0396
	m3	27.507	12.3701	15.1369	2.7754e-05		4.42836
	m4	27.6525	12.9026	14.7499	3.62948e-05		5.79112
WT HFHC 16W	m1	28.0725	13.2525	14.8201	3.45714e-05		5.51614
	m2	27.6809	13.9836	13.6974	7.52812e-05		12.0117
	m3	28.3847	13.3675	15.0171	3.01571e-05		4.8118
	m4	28.0561	13.8922	14.1638	5.4483e-05		8.69319
Group		HK3	18s	dCt	2^-ddCt	average	normalize		One-way analysis of variance (ANOVA)	P value	P value summary	Significantly different (P < 0.05)?
WT HFHC 0W	m1	29.2611	12.8106	16.4505	1.1166e-05	1.07223e-05	1.04138		WT HFHC 0w VS WT HFHC 4w	0.602	ns	No
	m2	29.0698	12.9949	16.0749	1.44865e-05		1.35105		WT HFHC 0w VS WT HFHC 8w	0.417	ns	No
	m3	28.9035	11.8304	17.0731	7.25225e-06		0.676368		WT HFHC 0w VS WT HFHC 16w	<0.001	***	Yes
	m4	28.6192	12.0073	16.6119	9.98464e-06		0.931199		WT HFHC 4w VS WT HFHC 8w	0.194	ns	No
WT HFHC 4W	m1	29.4926	13.2157	16.2769	1.25939e-05		1.17454		WT HFHC 4w VS WT HFHC 16w	<0.001	***	Yes
	m2	29.2997	13.2606	16.0391	1.48509e-05		1.38504		WT HFHC 8w VS WT HFHC 16w	<0.001	***	Yes
	m3	32.3076	13.4963	18.8113	2.17394e-06		0.202749
	m4	31.836	13.8976	17.9384	3.98115e-06		0.371294
WT HFHC 8W	m1	28.9308	12.9493	15.9815	1.54558e-05		1.44146
	m2	29.0084	13.081	15.9274	1.60466e-05		1.49655
	m3	28.7822	12.3701	16.4121	1.14675e-05		1.06949
	m4	28.9757	12.9026	16.0731	1.45054e-05		1.35282
WT HFHC 16W	m1	28.4869	13.2525	15.2344	2.59416e-05		2.4194
	m2	28.3436	13.9836	14.3601	4.75544e-05		4.43507
	m3	27.8062	13.3675	14.4386	4.50344e-05		4.20005
	m4	28.3592	13.8922	14.467	4.41566e-05		4.11819
Group		Pfkfb3	18s	dCt	2^-ddCt	average	normalize		One-way analysis of variance (ANOVA)	P value	P value summary	Significantly different (P < 0.05)?
WT HFHC 0W	m1	30.202	12.8106	17.3914	5.81668e-06	8.4226e-06	0.690603		WT HFHC 0w VS WT HFHC 4w	0.397	ns	No
	m2	29.9478	12.9949	16.953	7.88225e-06		0.935845		WT HFHC 0w VS WT HFHC 8w	0.002	**	Yes
	m3	28.7897	11.8304	16.9593	7.84776e-06		0.93175		WT HFHC 0w VS WT HFHC 16w	0.015	*	Yes
	m4	28.3368	12.0073	16.3294	1.21437e-05		1.4418		WT HFHC 4w VS WT HFHC 8w	<0.001	***	Yes
WT HFHC 4W	m1	30.3868	13.2157	17.1712	6.77592e-06		0.804492		WT HFHC 4w VS WT HFHC 16w	0.003	**	Yes
	m2	31.1454	13.2606	17.8848	4.13179e-06		0.49056		WT HFHC 8w VS WT HFHC 16w	0.313	ns	No
	m3	31.1918	13.4963	17.6955	4.71119e-06		0.559351
	m4	31.4754	13.8976	17.5778	5.11172e-06		0.606905
WT HFHC 8W	m1	27.9755	12.9493	15.0262	2.99692e-05		3.55819
	m2	28.338	13.081	15.257	2.55379e-05		3.03206
	m3	28.4688	12.3701	16.0987	1.42494e-05		1.69181
	m4	28.4305	12.9026	15.5278	2.11667e-05		2.51309
WT HFHC 16W	m1	29.68	13.2525	16.4275	1.13457e-05		1.34706
	m2	29.05	13.9836	15.0664	2.91444e-05		3.46026
	m3	29.2088	13.3675	15.8413	1.70331e-05		2.02231
	m4	29.6635	13.8922	15.7713	1.788e-05		2.12285
Group		Pkm	18s	dCt	2^-ddCt	average	normalize		One-way analysis of variance (ANOVA)	P value	P value summary	Significantly different (P < 0.05)?
WT HFHC 0W	m1	27.4532	12.8106	14.6426	3.90976e-05	4.20566e-05	0.929641		WT HFHC 0w VS WT HFHC 4w	0.986	ns	No
	m2	27.2939	12.9949	14.299	4.96106e-05		1.17961		WT HFHC 0w VS WT HFHC 8w	<0.001	***	Yes
	m3	26.526	11.8304	14.6955	3.76876e-05		0.896116		WT HFHC 0w VS WT HFHC 16w	0.005	**	Yes
	m4	26.5524	12.0073	14.5451	4.18308e-05		0.994629		WT HFHC 4w VS WT HFHC 8w	<0.001	***	Yes
WT HFHC 4W	m1	27.5838	13.2157	14.3682	4.72878e-05		1.12438		WT HFHC 4w VS WT HFHC 16w	0.005	**	Yes
	m2	27.1727	13.2606	13.9121	6.48706e-05		1.54246		WT HFHC 8w VS WT HFHC 16w	0.159	ns	No
	m3	28.8158	13.4963	15.3195	2.4456e-05		0.581501
	m4	29.0701	13.8976	15.1725	2.70784e-05		0.643856
WT HFHC 8W	m1	24.1438	12.9493	11.1945	0.000426702		10.1459
	m2	24.3605	13.081	11.2794	0.000402298		9.56561
	m3	25.1696	12.3701	12.7995	0.000140267		3.3352
	m4	24.0747	12.9026	11.1721	0.000433389		10.3049
WT HFHC 16W	m1	25.9726	13.2525	12.7201	0.000148202		3.52387
	m2	26.2907	13.9836	12.3072	0.000197318		4.69173
	m3	25.103	13.3675	11.7354	0.000293282		6.97351
	m4	25.2275	13.8922	11.3352	0.000387037		9.20275
Group		6pgd	18s	dCt	2^-ddCt	average	normalize		One-way analysis of variance (ANOVA)	P value	P value summary	Significantly different (P < 0.05)?
WT HFHC 0W	m1	28.1864	10.9466	17.2398	6.46108e-06	4.90597e-06	1.31698		WT HFHC 0w VS WT HFHC 4w	0.76	ns	No
	m2	27.656	9.58337	18.0726	3.62741e-06		0.739387		WT HFHC 0w VS WT HFHC 8w	<0.001	***	Yes
	m3	28.9893	11.4687	17.5206	5.31828e-06		1.08404		WT HFHC 0w VS WT HFHC 16w	0.018	*	Yes
	m4	29.0575	11.2022	17.8553	4.21713e-06		0.85959		WT HFHC 4w VS WT HFHC 8w	<0.001	***	Yes
WT HFHC 4W	m1	26.1341	10.1187	16.0154	1.50972e-05		3.07732		WT HFHC 4w VS WT HFHC 16w	0.031	*	Yes
	m2	27.3546	10.0529	17.3018	6.18937e-06		1.2616		WT HFHC 8w VS WT HFHC 16w	0.031	*	Yes
	m3	27.5846	9.2142	18.3704	2.95089e-06		0.601489
	m4	27.8902	9.14153	18.7487	2.27026e-06		0.462753
WT HFHC 8W	m1	28.0479	12.7999	15.2481	2.56964e-05		5.23778
	m2	27.9889	13.294	14.6949	3.77052e-05		7.68557
	m3	26.85	12.4652	14.3848	4.67444e-05		9.52805
	m4	27.8002	12.4652	15.335	2.41936e-05		4.93145
WT HFHC 16W	m1	26.4772	9.27437	17.2028	6.62871e-06		1.35115
	m2	25.2941	9.67104	15.623	1.98155e-05		4.03906
	m3	24.4931	9.40735	15.0858	2.87558e-05		5.86138
	m4	24.4162	9.1305	15.2857	2.50351e-05		5.10299
Group		G6pd	18s	dCt	2^-ddCt	average	normalize		One-way analysis of variance (ANOVA)	P value	P value summary	Significantly different (P < 0.05)?
WT HFHC 0W	m1	27.5076	10.9466	16.5611	1.03424e-05	6.9159e-06	1.49545		WT HFHC 0w VS WT HFHC 4w	0.532	ns	No
	m2	27.1156	9.58337	17.5323	5.27549e-06		0.762805		WT HFHC 0w VS WT HFHC 8w	<0.001	***	Yes
	m3	28.7188	11.4687	17.2501	6.41486e-06		0.927552		WT HFHC 0w VS WT HFHC 16w	0.01	*	Yes
	m4	28.6404	11.2022	17.4382	5.6309e-06		0.814195		WT HFHC 4w VS WT HFHC 8w	<0.001	***	Yes
WT HFHC 4W	m1	27.041	10.1187	16.9223	8.05146e-06		1.16419		WT HFHC 4w VS WT HFHC 16w	0.003	**	Yes
	m2	27.0184	10.0529	16.9655	7.81409e-06		1.12987		WT HFHC 8w VS WT HFHC 16w	0.006	**	Yes
	m3	28.6449	9.2142	19.4307	1.41503e-06		0.204606
	m4	28.3571	9.14153	19.2156	1.64257e-06		0.237506
WT HFHC 8W	m1	28.3448	12.7999	15.5449	2.09178e-05		3.02459
	m2	28.3736	13.294	15.0796	2.88795e-05		4.17581
	m3	27.2405	12.4652	14.7753	3.56607e-05		5.15633
	m4	27.5646	12.4652	15.0994	2.84851e-05		4.11878
WT HFHC 16W	m1	25.8661	9.27437	16.5918	1.01246e-05		1.46395
	m2	25.7503	9.67104	16.0793	1.44427e-05		2.08833
	m3	24.7874	9.40735	15.3801	2.34497e-05		3.39069
	m4	24.6776	9.1305	15.5471	2.08858e-05		3.01997
Group		Pygl	18s	dCt	2^-ddCt	average	normalize		One-way analysis of variance (ANOVA)	P value	P value summary	Significantly different (P < 0.05)?
WT HFHC 0W	m1	23.4855	10.9466	12.539	0.000168033	0.000102751	1.63535		WT HFHC 0w VS WT HFHC 4w	0.247	ns	No
	m2	23.3209	9.58337	13.7376	7.32113e-05		0.712515		WT HFHC 0w VS WT HFHC 8w	0.167	ns	No
	m3	24.9302	11.4687	13.4616	8.86476e-05		0.862746		WT HFHC 0w VS WT HFHC 16w	0.026	*	Yes
	m4	24.7919	11.2022	13.5898	8.11104e-05		0.789391		WT HFHC 4w VS WT HFHC 8w	0.804	ns	No
WT HFHC 4W	m1	23.9531	10.1187	13.8344	6.84588e-05		0.666262		WT HFHC 4w VS WT HFHC 16w	0.212	ns	No
	m2	23.8783	10.0529	13.8254	6.8887e-05		0.670429		WT HFHC 8w VS WT HFHC 16w	0.308	ns	No
	m3	22.4997	9.2142	13.2855	0.000100153		0.974722
	m4	22.9773	9.14153	13.8358	6.83939e-05		0.665631
WT HFHC 8W	m1	27.5178	12.7999	14.7179	3.71075e-05		0.361142
	m2	27.5178	13.294	14.2238	5.22643e-05		0.508653
	m3	25.7498	12.4652	13.2846	0.000100215		0.975327
	m4	25.8357	12.4652	13.3705	9.44222e-05		0.918946
WT HFHC 16W	m1	23.4107	9.27437	14.1363	5.55328e-05		0.540462
	m2	23.3199	9.67104	13.6489	7.78536e-05		0.757696
	m3	24.1483	9.40735	14.7409	3.65212e-05		0.355436
	m4	24.597	9.1305	15.4665	2.20858e-05		0.214946
Group		Ugp2	18S	dCt	2^-ddCt	average	normalize		One-way analysis of variance (ANOVA)	P value	P value summary	Significantly different (P < 0.05)?
WT HFHC 0W	m1	24.9447	11.149	13.7957	7.03215e-05	0.000111688	0.629626		WT HFHC 0w VS WT HFHC 4w	0.139	ns	No
	m2	24.6464	11.8951	12.7514	0.000145027		1.2985		WT HFHC 0w VS WT HFHC 8w	0.005	**	Yes
	m3	25.2299	12.0359	13.194	0.00010671		0.955435		WT HFHC 0w VS WT HFHC 16w	0.287	ns	No
	m4	25.492	12.5227	12.9693	0.000124692		1.11644		WT HFHC 4w VS WT HFHC 8w	0.095	ns	No
WT HFHC 4W	m1	24.8615	10.9941	13.8675	6.69081e-05		0.599064		WT HFHC 4w VS WT HFHC 16w	0.648	ns	No
	m2	25.319	11.8845	13.4346	9.03227e-05		0.808708		WT HFHC 8w VS WT HFHC 16w	0.041	*	Yes
	m3	26.4091	12.9667	13.4424	8.98323e-05		0.804317
	m4	27.4292	13.0805	14.3487	4.79305e-05		0.429148
WT HFHC 8W	m1	27.5015	12.4361	15.0654	2.91649e-05		0.261129
	m2	27.4555	12.6181	14.8374	3.41586e-05		0.30584
	m3	27.4605	12.6162	14.8443	3.39955e-05		0.30438
	m4	27.1494	11.7937	15.3556	2.38503e-05		0.213545
WT HFHC 16W	m1	26.5705	13.9258	12.6448	0.000156148		1.39808
	m2	26.8259	13.5831	13.2428	0.000103164		0.92368
	m3	27.1392	12.7153	14.4238	4.54984e-05		0.407371
	m4	27.3567	12.5591	14.7975	3.51157e-05		0.31441
Group		Gys1	18S	dCt	2^-ddCt	average	normalize		One-way analysis of variance (ANOVA)	P value	P value summary	Significantly different (P < 0.05)?
WT HFHC 0W	m1	33.0344	11.149	21.8854	2.58136e-07	3.03408e-07	0.850787		WT HFHC 0w VS WT HFHC 4w	0.893	ns	No
	m2	32.9147	11.8951	21.0197	4.70378e-07		1.55031		WT HFHC 0w VS WT HFHC 8w	<0.001	***	Yes
	m3	34.4309	12.0359	22.395	1.81309e-07		0.597575		WT HFHC 0w VS WT HFHC 16w	<0.001	***	Yes
	m4	34.173	12.5227	21.6503	3.0381e-07		1.00132		WT HFHC 4w VS WT HFHC 8w	<0.001	***	Yes
WT HFHC 4W	m1	32.3858	10.9941	21.3918	3.63446e-07		1.19788		WT HFHC 4w VS WT HFHC 16w	<0.001	***	Yes
	m2	32.9149	11.8845	21.0304	4.66884e-07		1.5388		WT HFHC 8w VS WT HFHC 16w	0.232	ns	No
	m3	35.23	12.9667	22.2633	1.98639e-07		0.654693
	m4	36.323	13.0805	23.2424	1.0077e-07		0.332127
WT HFHC 8W	m1	31.8975	12.4361	19.4614	1.38525e-06		4.56562
	m2	31.7875	12.6181	19.1693	1.69613e-06		5.59027
	m3	32.0924	12.9859	19.1065	1.77162e-06		5.83907
	m4	32.3637	12.9011	19.4626	1.38411e-06		4.56186
WT HFHC 16W	m1	33.7857	13.9258	19.8599	1.05091e-06		3.46368
	m2	33.064	13.5831	19.4809	1.36667e-06		4.50438
	m3	31.791	12.7153	19.0756	1.80995e-06		5.96538
	m4	32.1815	12.5591	19.6224	1.23899e-06		4.08356
Group		Idh1	18S	dCt	2^-ddCt	average	normalize		One-way analysis of variance (ANOVA)	P value	P value summary	Significantly different (P < 0.05)?
WT HFHC 0W	m1	24.0511	11.149	12.9021	0.000130642	0.000237675	0.549667		WT HFHC 0w VS WT HFHC 4w	0.65	ns	No
	m2	24.2044	11.8951	12.3094	0.000197017		0.828936		WT HFHC 0w VS WT HFHC 8w	0.508	ns	No
	m3	23.9689	12.0359	11.933	0.000255747		1.07604		WT HFHC 0w VS WT HFHC 16w	0.514	ns	No
	m4	23.9334	12.5227	11.4108	0.000367293		1.54536		WT HFHC 4w VS WT HFHC 8w	0.831	ns	No
WT HFHC 4W	m1	24.2033	10.9941	13.2092	0.000105591		0.444267		WT HFHC 4w VS WT HFHC 16w	0.838	ns	No
	m2	24.1011	11.8845	12.2166	0.000210109		0.884017		WT HFHC 8w VS WT HFHC 16w	0.993	ns	No
	m3	24.0868	12.9667	11.1201	0.000449277		1.8903
	m4	24.3571	13.0805	11.2766	0.000403101		1.69602
WT HFHC 8W	m1	25.4986	12.4361	13.0625	0.000116895		0.491826
	m2	24.5508	12.6181	11.9327	0.000255798		1.07625
	m3	23.9398	12.9859	10.9539	0.000504122		2.12106
	m4	24.2143	12.9011	11.3132	0.000392987		1.65346
WT HFHC 16W	m1	24.59	13.9258	10.6643	0.000616223		2.59271
	m2	25.2122	13.5831	11.6291	0.000315704		1.3283
	m3	25.1974	12.7153	12.4821	0.000174791		0.735422
	m4	25.1794	12.5591	12.6203	0.000158827		0.668255
Group		Ogdh	18S	dCt	2^-ddCt	average	normalize		One-way analysis of variance (ANOVA)	P value	P value summary	Significantly different (P < 0.05)?
WT HFHC 0W	m1	26.6347	11.149	15.4856	2.17955e-05	3.72407e-05	0.585261		WT HFHC 0w VS WT HFHC 4w	0.253	ns	No
	m2	27.0364	11.8951	15.1413	2.767e-05		0.743004		WT HFHC 0w VS WT HFHC 8w	0.67	ns	No
	m3	26.4281	12.0359	14.3923	4.65051e-05		1.24877		WT HFHC 0w VS WT HFHC 16w	0.877	ns	No
	m4	26.7265	12.5227	14.2039	5.29922e-05		1.42296		WT HFHC 4w VS WT HFHC 8w	0.127	ns	No
WT HFHC 4W	m1	27.1192	10.9941	16.1251	1.39914e-05		0.375703		WT HFHC 4w VS WT HFHC 16w	0.199	ns	No
	m2	27.2704	11.8845	15.3859	2.33556e-05		0.627152		WT HFHC 8w VS WT HFHC 16w	0.785	ns	No
	m3	28.06	12.9667	15.0933	2.86058e-05		0.768133
	m4	28.1351	13.0805	15.0545	2.9386e-05		0.789082
WT HFHC 8W	m1	27.828	12.4361	15.3919	2.3258e-05		0.624533
	m2	27.8593	12.6181	15.2412	2.58196e-05		0.693317
	m3	27.1411	12.9859	14.1552	5.481e-05		1.47178
	m4	26.8189	12.9011	13.9178	6.46138e-05		1.73503
WT HFHC 16W	m1	27.8633	13.9258	13.9375	6.37362e-05		1.71147
	m2	28.3611	13.5831	14.778	3.55939e-05		0.95578
	m3	27.6169	12.7153	14.9016	3.26726e-05		0.877336
	m4	27.9043	12.5591	15.3452	2.40235e-05		0.645086
Group		Acadm	18s	dCt	2^-ddCt	average	normalize		One-way analysis of variance (ANOVA)	P value	P value summary	Significantly different (P < 0.05)?
WT HFHC 0W	m1	24.4967	11.6928	12.8039	0.000139847	0.000193205	0.723825		WT HFHC 0w VS WT HFHC 4w	0.796	ns	No
	m2	24.6497	11.5658	13.0839	0.000115175		0.596129		WT HFHC 0w VS WT HFHC 8w	0.675	ns	No
	m3	24.4476	12.1617	12.2859	0.000200256		1.03649		WT HFHC 0w VS WT HFHC 16w	0.4	ns	No
	m4	24.972	13.3513	11.6208	0.000317543		1.64355		WT HFHC 4w VS WT HFHC 8w	0.871	ns	No
WT HFHC 4W	m1	26.4211	13.6987	12.7224	0.000147968		0.765861		WT HFHC 4w VS WT HFHC 16w	0.278	ns	No
	m2	26.3261	13.3648	12.9613	0.000125392		0.649011		WT HFHC 8w VS WT HFHC 16w	0.217	ns	No
	m3	25.7653	14.6446	11.1207	0.000449095		2.32444
	m4	26.0212	13.4279	12.5933	0.000161821		0.837558
WT HFHC 8W	m1	26.9855	13.2396	13.7459	7.27906e-05		0.376752
	m2	26.7348	12.1704	14.5645	4.12725e-05		0.21362
	m3	24.5509	12.7423	11.8086	0.000278768		1.44286
	m4	23.8312	13.0332	10.798	0.00056166		2.90706
WT HFHC 16W	m1	26.4479	13.3684	13.0795	0.000115524		0.597934
	m2	26.4761	13.3683	13.1078	0.000113281		0.586326
	m3	27.5756	14.0544	13.5212	8.50569e-05		0.440241
	m4	27.4178	13.9867	13.4311	9.05376e-05		0.468608
Group		Hadh	18S	dCt	2^-ddCt	average	normalize		One-way analysis of variance (ANOVA)	P value	P value summary	Significantly different (P < 0.05)?
WT HFHC 0W	m1	24.5435	11.149	13.3944	9.28694e-05	0.000300948	0.30859		WT HFHC 0w VS WT HFHC 4w	0.285	ns	No
	m2	23.8522	11.8951	11.9572	0.000251493		0.83567		WT HFHC 0w VS WT HFHC 8w	0.138	ns	No
	m3	23.6065	12.0359	11.5706	0.000328777		1.09247		WT HFHC 0w VS WT HFHC 16w	0.363	ns	No
	m4	23.4026	12.5227	10.8799	0.000530652		1.76327		WT HFHC 4w VS WT HFHC 8w	0.648	ns	No
WT HFHC 4W	m1	24.7186	10.9941	13.7245	7.38781e-05		0.245485		WT HFHC 4w VS WT HFHC 16w	0.866	ns	No
	m2	24.1377	11.8845	12.2532	0.000204845		0.680666		WT HFHC 8w VS WT HFHC 16w	0.534	ns	No
	m3	25.3221	12.9667	12.3554	0.000190832		0.634103
	m4	24.6747	13.0805	11.5941	0.000323463		1.07482
WT HFHC 8W	m1	26.272	12.4361	13.836	6.83837e-05		0.227228
	m2	26.4941	12.6181	13.876	6.65151e-05		0.221019
	m3	24.874	12.9859	11.8881	0.000263828		0.876656
	m4	25.0357	12.9011	12.1346	0.000222394		0.738978
WT HFHC 16W	m1	25.6596	13.9258	11.7339	0.000293598		0.975579
	m2	25.138	13.5831	11.5549	0.000332366		1.1044
	m3	25.7848	12.7153	13.0694	0.000116334		0.386558
	m4	25.6562	12.5591	13.097	0.000114132		0.379242
