# Supplementary material for: Hyperactivated glycolysis drives spatially patterned Kupffer cell depletion in MASLD
Source: eLife. 2026 May 26;14:RP109206. doi: 10.7554/eLife.109206 (PMC13211875; doi:10.7554/eLife.109206)
Supplement: Figure 4—figure supplement 1—source data 1. [file elife-109206-fig4-figsupp1-data1.xlsx]

## Sheet: Figure S1B
Group	Cl-Casp 3+	Nucleus	Cl-Casp 3+/Nucleus		One-way analysis of variance (ANOVA)	P value	P value summary	Significantly different (P < 0.05)?
Blank	0	36	0		Blank VS DMSO	0.792	ns	No
	1	38	2.63158		Blank VS Oligo	<0.001	***	Yes
	0	51	0		DMSO VS Oligo	<0.001	***	Yes
	0	52	0
	1	54	1.85185
	1	46	2.17391
	0	29	0
DMSO	0	63	0
	1	45	2.22222
	2	58	3.44828
	0	42	0
	0	43	0
	1	40	2.5
Oligo	7	32	21.875
	8	33	24.2424
	6	25	24
	6	41	14.6341
	6	37	16.2162
	8	57	14.0351
	6	36	16.6667
	7	39	17.9487
	6	28	21.4286
