# Supplementary material for: Hyperactivated glycolysis drives spatially patterned Kupffer cell depletion in MASLD
Source: eLife. 2026 May 26;14:RP109206. doi: 10.7554/eLife.109206 (PMC13211875; doi:10.7554/eLife.109206)
Supplement: Figure 4—source data 1. [file elife-109206-fig4-data1.xlsx]

## Sheet: Figure 4A
Group	Cl-Casp 3+	Nucleus	Cl-Casp 3+/Nucleus		One-way analysis of variance (ANOVA)	P value	P value summary	Significantly different (P < 0.05)?
5.5mM Glc	0	31	0		5.5mM Glc VS 5.5mM Glc+PA	<0.001	***	Yes
	2	44	4.54545		5.5mM Glc VS 10mM Glc+PA	<0.001	***	Yes
	0	37	0		5.5mM Glc+PA VS 10mM Glc+PA	<0.001	***	Yes
	1	40	2.5
	0	42	0
	1	45	2.22222
	1	37	2.7027
	1	40	2.5
	2	41	4.87805
	0	34	0
	1	47	2.12766
5.5mM Glc+PA	3	49	6.12245
	6	36	16.6667
	5	45	11.1111
	6	46	13.0435
	4	39	10.2564
	5	38	13.1579
	4	45	8.88889
	6	45	13.3333
	7	43	16.2791
	4	34	11.7647
	6	35	17.1429
	5	29	17.2414
	4	35	11.4286
	6	42	14.2857
	5	48	10.4167
	4	35	11.4286
10mM Glc+PA	10	45	22.2222
	13	45	28.8889
	15	44	34.0909
	10	40	25
	10	32	31.25
	10	42	23.8095
	8	32	25
	12	40	30
	7	39	17.9487
	11	45	24.4444
	13	29	44.8276
	7	35	20
	12	51	23.5294

## Sheet: Figure 4C
Group	Cl-Casp 3+	Nucleus	Cl-Casp 3+/Nucleus		One-way analysis of variance (ANOVA)	P value	P value summary	Significantly different (P < 0.05)?
Blank	1	59	1.69492		Blank VS DMSO	0.711	ns	No
	0	50	0		Blank VS PS48	<0.001	***	Yes
	0	41	0		DMSO VS PS48	<0.001	***	Yes
	0	42	0
	0	44	0
	1	35	2.85714
DMSO	1	43	2.32558
	0	38	0
	0	50	0
	0	39	0
	2	51	3.92157
PS48	4	25	16
	9	55	16.3636
	5	40	12.5
	7	42	16.6667
	5	33	15.1515
	5	55	9.09091

## Sheet: Figure 4G
Group	TIM4+	TIM4+TUNEL+	TIM4+TUNEL+/TIM4+	TIM4+TUNEL+/TIM4+Average		t` test	P value	P value summary	Significantly different (P < 0.05)?
Vehicle M1	46	15	32.6087	35.7697		Vehicle VS 2-DG	0.005	**	Yes
	51	19	37.2549
	47	20	42.5532
	48	15	31.25
	38	16	42.1053
	52	15	28.8462
Vehicle M2	61	27	44.2623	38.3281
	52	22	42.3077
	43	16	37.2093
	44	18	40.9091
	47	20	42.5532
	42	14	33.3333
	45	18	40
	38	13	34.2105
	41	11	26.8293
	35	16	45.7143
	41	14	34.1463
	39	15	38.4615
Vehicle M3	37	11	29.7297	30.0425
	42	16	38.0952
	30	9	30
	43	12	27.907
	36	11	30.5556
	41	13	31.7073
2-DG M1	35	6	17.1429	15.004
	43	1	2.32558
	45	9	20
	41	8	19.5122
	46	6	13.0435
	50	9	18
2-DG M2	50	11	22	22.4794
	43	10	23.2558
	42	10	23.8095
	56	11	19.6429
	57	10	17.5439
	38	9	23.6842
	62	17	27.4194
2-DG M3	48	5	10.4167	17.6578
	57	11	19.2982
	53	10	18.8679
	69	14	20.2899
	66	9	13.6364
	64	15	23.4375
2-DG M4	44	0	0	9.47104
	57	5	8.77193
	45	5	11.1111
	48	4	8.33333
	49	6	12.2449
	43	4	9.30233
	47	7	14.8936
	45	5	11.1111
