# Supplementary material for: Hyperactivated glycolysis drives spatially patterned Kupffer cell depletion in MASLD
Source: eLife. 2026 May 26;14:RP109206. doi: 10.7554/eLife.109206 (PMC13211875; doi:10.7554/eLife.109206)
Supplement: Figure 5—figure supplement 1—source data 1. [file elife-109206-fig5-figsupp1-data1.xlsx]

## Sheet: Figure S1A
Group	Nos2	18s	dCt	2^-ddCt	average	normalize		One-way analysis of variance (ANOVA)	P value	P value summary	Significantly different (P < 0.05)?
WT HFHC 0w M1	34.1573	11.8952	22.2621	1.98816e-07	3.76766e-07	0.527691		WT HFHC 0w VS Chi3l1-/- HFHC 0w	0.023	*	Yes
WT HFHC 0w M2	33.9618	12.0879	21.8739	2.60197e-07		0.690608		WT HFHC 8w VS Chi3l1-/- HFHC 8w	0.012	*	Yes
WT HFHC 0w M3	32.84	11.7626	21.0774	4.51945e-07		1.19954		WT HFHC 16w VS Chi3l1-/- HFHC 16w	0.286	ns	No
WT HFHC 0w M4	32.719	12.041	20.6779	5.96105e-07		1.58216		WT HFHC 0w VS WT HFHC 8w	0.134	ns	No
WT HFHC 8w M1	33.4453	13.1504	20.2949	7.77361e-07		2.06325		WT HFHC 0w VS WT HFHC 16w	0.487	ns	No
WT HFHC 8w M2	33.6127	12.6033	21.0094	4.73744e-07		1.2574		WT HFHC 8w VS WT HFHC 16w	0.407	ns	No
WT HFHC 8w M3	31.9809	12.6853	19.2955	1.55405e-06		4.12472		Chi3l1-/- HFHC 0w VS Chi3l1-/- HFHC 8w	0.09	ns	No
WT HFHC 8w M4	33.2473	13.3414	19.9058	1.01799e-06		2.70191		Chi3l1-/- HFHC 0w VS Chi3l1-/- HFHC 16w	0.507	ns	No
WT HFHC 8w M5	31.9377	11.4733	20.4644	6.91208e-07		1.83458		Chi3l1-/- HFHC 8w VS Chi3l1-/- HFHC 16w	0.028	*	Yes
WT HFHC 8w M6	32.1083	11.1512	20.9571	4.91227e-07		1.3038
WT HFHC 8w M7	31.6091	11.0071	20.602	6.28323e-07		1.66767
WT HFHC 16w M1	33.4703	12.5269	20.9434	4.95922e-07		1.31626
WT HFHC 16w M2	32.4942	12.7074	19.7868	1.10556e-06		2.93435
WT HFHC 16w M3	33.2591	11.9084	21.3506	3.7395e-07		0.992528
WT HFHC 16w M4	32.3783	11.6227	20.7556	5.64875e-07		1.49927
WT HFHC 16w M5	33.2142	11.9264	21.2878	3.90603e-07		1.03673
Chi3l1-/- HFHC 0w M1	33.4864	12.113	21.3734	3.68102e-07		0.977005
Chi3l1-/- HFHC 0w M2	32.7736	12.9104	19.8631	1.04857e-06		2.78308
Chi3l1-/- HFHC 0w M3	33.4873	12.654	20.8333	5.35231e-07		1.42059
Chi3l1-/- HFHC 0w M4	33.562	12.9702	20.5917	6.32806e-07		1.67957
Chi3l1-/- HFHC 0w M5	31.8532	12.6219	19.2314	1.62471e-06		4.31225
Chi3l1-/- HFHC 0w M6	33.272	13.3951	19.877	1.03856e-06		2.75651
Chi3l1-/- HFHC 0w M7	31.9794	13.0892	18.8902	2.0582e-06		5.46281
Chi3l1-/- HFHC 8w M1	31.4177	11.2833	20.1344	8.68862e-07		2.30611
Chi3l1-/- HFHC 8w M2	31.2309	12.5051	18.7258	2.30661e-06		6.12214
Chi3l1-/- HFHC 8w M3	32.4212	12.5189	19.9022	1.02054e-06		2.70867
Chi3l1-/- HFHC 8w M4	31.2543	12.0966	19.1577	1.70982e-06		4.53814
Chi3l1-/- HFHC 8w M5	31.7867	12.5257	19.261	1.5917e-06		4.22463
Chi3l1-/- HFHC 16w M1	34.6934	12.9163	21.7771	2.78261e-07		0.738551
Chi3l1-/- HFHC 16w M2	32.145	12.524	19.621	1.24016e-06		3.29158
Chi3l1-/- HFHC 16w M3	33.2337	13.3518	19.882	1.03498e-06		2.74702
Chi3l1-/- HFHC 16w M4	33.2716	13.479	19.7926	1.10112e-06		2.92256
Chi3l1-/- HFHC 16w M5	32.9889	12.9202	20.0687	9.0932e-07		2.41349
Chi3l1-/- HFHC 16w M6	33.637	13.1994	20.4376	7.04169e-07		1.86898
Group	Cxcl9	18S	dCt	2^-ddCt	average	normalize		One-way analysis of variance (ANOVA)	P value	P value summary	Significantly different (P < 0.05)?
WT HFHC 0w M1	27.5065	11.8952	15.6112	1.99778e-05	4.12399e-05	0.484429		WT HFHC 0w VS Chi3l1-/- HFHC 0w	0.523	ns	No
WT HFHC 0w M2	27.4356	12.0879	15.3477	2.39822e-05		0.581529		WT HFHC 8w VS Chi3l1-/- HFHC 8w	0.086	ns	No
WT HFHC 0w M3	26.3133	11.9743	14.339	4.82533e-05		1.17006		WT HFHC 16w VS Chi3l1-/- HFHC 16w	0.004	**	Yes
WT HFHC 0w M4	26.4236	12.6769	13.7468	7.27463e-05		1.76398		WT HFHC 0w VS WT HFHC 8w	0.037	*	Yes
WT HFHC 8w M1	25.8449	13.4823	12.3625	0.000189893		4.60459		WT HFHC 0w VS WT HFHC 16w	0.82	ns	No
WT HFHC 8w M2	26.4391	13.5819	12.8572	0.000134769		3.26793		WT HFHC 8w VS WT HFHC 16w	0.047	*	Yes
WT HFHC 8w M3	26.8906	13.1504	13.7402	7.30787e-05		1.77204		Chi3l1-/- HFHC 0w VS Chi3l1-/- HFHC 8w	0.899	ns	No
WT HFHC 8w M4	27.0292	12.6033	14.4259	4.54345e-05		1.10171		Chi3l1-/- HFHC 0w VS Chi3l1-/- HFHC 16w	0.007	**	Yes
WT HFHC 8w M5	24.972	12.8472	12.1248	0.000223911		5.42948		Chi3l1-/- HFHC 8w VS Chi3l1-/- HFHC 16w	0.009	**	Yes
WT HFHC 8w M6	24.8156	12.6853	12.1302	0.000223069		5.40905
WT HFHC 8w M7	27.7881	13.3869	14.4011	4.62194e-05		1.12074
WT HFHC 16w M1	26.3267	12.6409	13.6858	7.58867e-05		1.84013
WT HFHC 16w M2	26.7283	12.4363	14.292	4.98527e-05		1.20885
WT HFHC 16w M3	26.0873	11.9512	14.1361	5.55408e-05		1.34677
WT HFHC 16w M4	26.8698	11.6071	15.2627	2.54369e-05		0.616803
WT HFHC 16w M5	26.8675	12.6199	14.2477	5.14077e-05		1.24655
Chi3l1-/- HFHC 0w M1	26.3555	12.4564	13.8991	6.54585e-05		1.58726
Chi3l1-/- HFHC 0w M2	26.2517	12.5821	13.6696	7.67446e-05		1.86093
Chi3l1-/- HFHC 0w M3	26.4297	12.9104	13.5192	8.51732e-05		2.06531
Chi3l1-/- HFHC 0w M4	26.4936	12.654	13.8397	6.82097e-05		1.65397
Chi3l1-/- HFHC 0w M5	26.3231	12.2375	14.0856	5.752e-05		1.39477
Chi3l1-/- HFHC 0w M6	26.3138	12.525	13.7888	7.0656e-05		1.71329
Chi3l1-/- HFHC 0w M7	27.0837	12.9702	14.1134	5.64196e-05		1.36808
Chi3l1-/- HFHC 8w M1	25.9187	11.2833	14.6354	3.92932e-05		0.952796
Chi3l1-/- HFHC 8w M2	25.8618	12.5051	13.3567	9.53306e-05		2.31161
Chi3l1-/- HFHC 8w M3	26.2512	12.5189	13.7323	7.34803e-05		1.78178
Chi3l1-/- HFHC 8w M4	26.097	11.9045	14.1924	5.34131e-05		1.29518
Chi3l1-/- HFHC 8w M5	26.6476	12.5257	14.1219	5.60903e-05		1.3601
Chi3l1-/- HFHC 16w M1	24.5322	12.524	12.0082	0.000242755		5.88641
Chi3l1-/- HFHC 16w M2	24.6436	12.0654	12.5782	0.000163521		3.96511
Chi3l1-/- HFHC 16w M3	23.4365	12.165	11.2716	0.000404506		9.80861
Chi3l1-/- HFHC 16w M4	26.4342	13.479	12.9552	0.00012592		3.05334
Chi3l1-/- HFHC 16w M5	26.977	12.9202	14.0569	5.86751e-05		1.42277
Chi3l1-/- HFHC 16w M6	26.9336	13.1994	13.7342	7.33825e-05		1.77941
Group	CⅡTA	18S	dCt	2^-ddCt	average	normalize		One-way analysis of variance (ANOVA)	P value	P value summary	Significantly different (P < 0.05)?
WT HFHC 0w M1	28.1059	10.9755	17.1304	6.97005e-06	1.82809e-05	0.381275		WT HFHC 0w VS Chi3l1-/- HFHC 0w	0.26	ns	No
WT HFHC 0w M2	27.2161	11.9743	15.2418	2.58075e-05		1.41172		WT HFHC 8w VS Chi3l1-/- HFHC 8w	0.73	ns	No
WT HFHC 0w M3	28.9628	12.8395	16.1233	1.40088e-05		0.766306		WT HFHC 16w VS Chi3l1-/- HFHC 16w	0.024	*	Yes
WT HFHC 0w M4	27.8894	12.6769	15.2125	2.63372e-05		1.4407		WT HFHC 0w VS WT HFHC 8w	0.23	ns	No
WT HFHC 8w M1	28.7118	13.4823	15.2295	2.60297e-05		1.42387		WT HFHC 0w VS WT HFHC 16w	0.003	**	Yes
WT HFHC 8w M2	28.5575	13.5819	14.9756	3.10373e-05		1.6978		WT HFHC 8w VS WT HFHC 16w	0.024	*	Yes
WT HFHC 8w M3	28.5254	13.1504	15.375	2.35321e-05		1.28725		Chi3l1-/- HFHC 0w VS Chi3l1-/- HFHC 8w	0.037	*	Yes
WT HFHC 8w M4	27.6481	12.8472	14.801	3.50318e-05		1.91631		Chi3l1-/- HFHC 0w VS Chi3l1-/- HFHC 16w	0.015	*	Yes
WT HFHC 8w M5	27.7605	12.6853	15.0751	2.89693e-05		1.58468		Chi3l1-/- HFHC 8w VS Chi3l1-/- HFHC 16w	0.799	ns	No
WT HFHC 8w M6	28.9316	13.3869	15.5447	2.09215e-05		1.14444
WT HFHC 8w M7	28.5658	13.3414	15.2244	2.61217e-05		1.42891
WT HFHC 16w M1	28.1392	12.5269	15.6124	1.99624e-05		1.09198
WT HFHC 16w M2	28.0113	12.7074	15.3039	2.47217e-05		1.35232
WT HFHC 16w M3	27.3424	12.4377	14.9047	3.26024e-05		1.78341
WT HFHC 16w M4	26.4545	12.3937	14.0608	5.85157e-05		3.20092
WT HFHC 16w M5	25.9129	12.3648	13.5481	8.3485e-05		4.56679
Chi3l1-/- HFHC 0w M1	29.7137	12.3591	17.3546	5.96694e-06		0.326403
Chi3l1-/- HFHC 0w M2	29.319	12.9104	16.4086	1.14955e-05		0.628825
Chi3l1-/- HFHC 0w M3	28.5458	12.654	15.8918	1.64469e-05		0.89968
Chi3l1-/- HFHC 0w M4	29.1777	12.2375	16.9402	7.95219e-06		0.435
Chi3l1-/- HFHC 0w M5	28.8753	12.525	16.3503	1.19689e-05		0.654723
Chi3l1-/- HFHC 0w M6	29.8769	12.9702	16.9066	8.13943e-06		0.445243
Chi3l1-/- HFHC 0w M7	29.9147	12.6219	17.2928	6.22783e-06		0.340674
Chi3l1-/- HFHC 8w M1	28.4935	12.5051	15.9884	1.53816e-05		0.841406
Chi3l1-/- HFHC 8w M2	27.6955	12.5189	15.1766	2.70021e-05		1.47707
Chi3l1-/- HFHC 8w M3	27.9674	11.9045	16.0629	1.46077e-05		0.799071
Chi3l1-/- HFHC 8w M4	26.7956	12.0966	14.699	3.7598e-05		2.05669
Chi3l1-/- HFHC 8w M5	27.5402	12.5257	15.0145	3.0213e-05		1.65271
Chi3l1-/- HFHC 16w M1	27.0397	12.165	14.8747	3.32874e-05		1.82089
Chi3l1-/- HFHC 16w M2	27.5035	12.7055	14.798	3.51034e-05		1.92023
Chi3l1-/- HFHC 16w M3	29.0135	13.3518	15.6617	1.92912e-05		1.05526
Chi3l1-/- HFHC 16w M4	28.8861	13.479	15.4071	2.3015e-05		1.25896
Chi3l1-/- HFHC 16w M5	28.3281	12.9202	15.4079	2.3001e-05		1.2582
Chi3l1-/- HFHC 16w M6	28.3698	13.1994	15.1704	2.7118e-05		1.4834
Group	CD86	18S	dCt	2^-ddCt	average	normalize		One-way analysis of variance (ANOVA)	P value	P value summary	Significantly different (P < 0.05)?
WT HFHC 0w M1	27.1186	12.0879	15.0307	2.98757e-05	6.53474e-05	0.457182		WT HFHC 0w VS Chi3l1-/- HFHC 0w	0.08	ns	No
WT HFHC 0w M2	25.7402	11.9743	13.7659	7.17895e-05		1.09858		WT HFHC 8w VS Chi3l1-/- HFHC 8w	0.341	ns	No
WT HFHC 0w M3	25.8365	11.7626	14.0738	5.79903e-05		0.887415		WT HFHC 16w VS Chi3l1-/- HFHC 16w	0.444	ns	No
WT HFHC 0w M4	26.1024	12.8395	13.2629	0.000101734		1.55682		WT HFHC 0w VS WT HFHC 8w	0.094	ns	No
WT HFHC 8w M1	27.0264	13.4823	13.544	8.37217e-05		1.28118		WT HFHC 0w VS WT HFHC 16w	0.201	ns	No
WT HFHC 8w M2	26.4944	13.5819	12.9125	0.000129707		1.98488		WT HFHC 8w VS WT HFHC 16w	0.726	ns	No
WT HFHC 8w M3	26.6512	13.1504	13.5008	8.62687e-05		1.32015		Chi3l1-/- HFHC 0w VS Chi3l1-/- HFHC 8w	0.299	ns	No
WT HFHC 8w M4	26.449	12.6033	13.8457	6.79266e-05		1.03947		Chi3l1-/- HFHC 0w VS Chi3l1-/- HFHC 16w	0.2	ns	No
WT HFHC 8w M5	25.4387	12.8472	12.5915	0.00016202		2.47937		Chi3l1-/- HFHC 8w VS Chi3l1-/- HFHC 16w	0.857	ns	No
WT HFHC 8w M6	25.6879	12.6853	13.0026	0.000121853		1.86469
WT HFHC 8w M7	27.1475	13.3414	13.8061	6.98156e-05		1.06838
WT HFHC 16w M1	26.1115	12.5269	13.5846	8.14011e-05		1.24567
WT HFHC 16w M2	26.3765	12.7074	13.6691	7.67715e-05		1.17482
WT HFHC 16w M3	25.3351	12.4377	12.8974	0.000131068		2.0057
WT HFHC 16w M4	25.7153	12.3937	13.3216	9.76785e-05		1.49476
WT HFHC 16w M5	25.7672	12.3648	13.4024	9.2357e-05		1.41332
Chi3l1-/- HFHC 0w M1	25.6259	12.3591	13.2668	0.000101463		1.55268
Chi3l1-/- HFHC 0w M2	25.8451	12.113	13.732	7.34926e-05		1.12464
Chi3l1-/- HFHC 0w M3	25.7847	12.9104	12.8742	0.000133188		2.03816
Chi3l1-/- HFHC 0w M4	25.3647	12.654	12.7107	0.000149175		2.28279
Chi3l1-/- HFHC 0w M5	25.8541	12.2375	13.6166	7.96141e-05		1.21832
Chi3l1-/- HFHC 0w M6	25.6103	12.525	13.0853	0.000115062		1.76077
Chi3l1-/- HFHC 0w M7	26.5429	12.9702	13.5727	8.20763e-05		1.256
Chi3l1-/- HFHC 8w M1	27.0882	12.5051	14.5832	4.07412e-05		0.623455
Chi3l1-/- HFHC 8w M2	25.9792	12.5189	13.4603	8.87249e-05		1.35774
Chi3l1-/- HFHC 8w M3	25.985	11.9045	14.0805	5.77223e-05		0.883315
Chi3l1-/- HFHC 8w M4	25.4308	12.0966	13.3342	9.68292e-05		1.48176
Chi3l1-/- HFHC 8w M5	25.4042	12.5257	12.8785	0.000132794		2.03212
Chi3l1-/- HFHC 16w M1	25.1461	12.524	12.6221	0.000158626		2.42743
Chi3l1-/- HFHC 16w M2	25.4151	12.0654	13.3497	9.57922e-05		1.46589
Chi3l1-/- HFHC 16w M3	27.8721	13.3518	14.5204	4.25533e-05		0.651186
Chi3l1-/- HFHC 16w M4	25.9846	12.7055	13.2791	0.000100598		1.53943
Chi3l1-/- HFHC 16w M5	27.785	12.9202	14.8648	3.35154e-05		0.51288
Chi3l1-/- HFHC 16w M6	27.6028	13.1994	14.4034	4.61466e-05		0.706174
Group	CCL3	18S	dCt	2^-ddCt	average	normalize		One-way analysis of variance (ANOVA)	P value	P value summary	Significantly different (P < 0.05)?
WT HFHC 0w M1	25.9228	11.7806	14.1422	5.53056e-05	6.89763e-05	0.801806		WT HFHC 0w VS Chi3l1-/- HFHC 0w	0.933	ns	No
WT HFHC 0w M2	26.6905	12.213	14.4775	4.38361e-05		0.635523		WT HFHC 8w VS Chi3l1-/- HFHC 8w	0.034	*	Yes
WT HFHC 0w M3	26.1964	12.4099	13.7865	7.07686e-05		1.02598		WT HFHC 16w VS Chi3l1-/- HFHC 16w	0.209	ns	No
WT HFHC 0w M4	25.4994	12.2957	13.2037	0.000105995		1.53669		WT HFHC 0w VS WT HFHC 8w	0.002	**	Yes
WT HFHC 8w M1	25.0941	12.4282	12.6659	0.00015388		2.23091		WT HFHC 0w VS WT HFHC 16w	0.109	ns	No
WT HFHC 8w M2	24.9741	11.7911	13.1831	0.000107523		1.55884		WT HFHC 8w VS WT HFHC 16w	0.102	ns	No
WT HFHC 8w M3	25.1839	11.9482	13.2357	0.000103671		1.50299		Chi3l1-/- HFHC 0w VS Chi3l1-/- HFHC 8w	0.157	ns	No
WT HFHC 8w M4	24.9695	12.2938	12.6757	0.000152836		2.21577		Chi3l1-/- HFHC 0w VS Chi3l1-/- HFHC 16w	0.002	**	Yes
WT HFHC 8w M5	25.116	12.9768	12.1392	0.000221688		3.21398		Chi3l1-/- HFHC 8w VS Chi3l1-/- HFHC 16w	0.082	ns	No
WT HFHC 8w M6	25.4342	13.3076	12.1266	0.000223635		3.2422
WT HFHC 8w M7	25.2997	12.6416	12.6581	0.000154717		2.24304
WT HFHC 16w M1	25.6175	13.0558	12.5617	0.000165408		2.39804
WT HFHC 16w M2	25.745	13.2303	12.5147	0.000170887		2.47748
WT HFHC 16w M3	24.6706	11.2283	13.4423	8.98396e-05		1.30247
WT HFHC 16w M4	25.0487	11.6982	13.3505	9.57402e-05		1.38801
WT HFHC 16w M5	25.0781	11.1209	13.9572	6.28732e-05		0.911518
Chi3l1-/- HFHC 0w M1	26.3453	11.9507	14.3946	4.64296e-05		0.673124
Chi3l1-/- HFHC 0w M2	25.5936	11.7745	13.8191	6.91883e-05		1.00307
Chi3l1-/- HFHC 0w M3	25.4021	11.9176	13.4845	8.7249e-05		1.26491
Chi3l1-/- HFHC 0w M4	26.6354	12.5584	14.077	5.78612e-05		0.838856
Chi3l1-/- HFHC 0w M5	26.34	12.6356	13.7044	7.49165e-05		1.08612
Chi3l1-/- HFHC 0w M6	26.2782	12.4007	13.8775	6.64446e-05		0.963295
Chi3l1-/- HFHC 0w M7	26.7837	12.869	13.9148	6.47502e-05		0.938731
Chi3l1-/- HFHC 8w M1	24.4836	12.298	12.1856	0.000214673		3.11227
Chi3l1-/- HFHC 8w M2	25.3066	10.9191	14.3875	4.66587e-05		0.676445
Chi3l1-/- HFHC 8w M3	25.9259	12.427	13.4989	8.63825e-05		1.25235
Chi3l1-/- HFHC 8w M4	26.4988	13.0276	13.4711	8.80623e-05		1.2767
Chi3l1-/- HFHC 8w M5	26.3576	12.77	13.5877	8.12287e-05		1.17763
Chi3l1-/- HFHC 16w M1	25.4455	12.7725	12.673	0.000153127		2.21999
Chi3l1-/- HFHC 16w M2	25.2897	12.8575	12.4322	0.00018094		2.62322
Chi3l1-/- HFHC 16w M3	25.8321	12.4354	13.3967	9.27214e-05		1.34425
Chi3l1-/- HFHC 16w M4	24.8653	12.4587	12.4066	0.000184179		2.67017
Chi3l1-/- HFHC 16w M5	25.397	13.0253	12.3718	0.000188682		2.73546
Chi3l1-/- HFHC 16w M6	25.7359	12.4996	13.2363	0.000103627		1.50236
Group	CCL5	18S	dCt	2^-ddCt	average	normalize		One-way analysis of variance (ANOVA)	P value	P value summary	Significantly different (P < 0.05)?
WT HFHC 0w M1	25.4466	11.7806	13.666	7.69367e-05	6.63448e-05	1.15965		WT HFHC 0w VS Chi3l1-/- HFHC 0w	0.003	**	Yes
WT HFHC 0w M2	25.5339	12.4099	13.124	0.000112018		1.68842		WT HFHC 8w VS Chi3l1-/- HFHC 8w	0.292	ns	No
WT HFHC 0w M3	27.0861	12.6028	14.4832	4.36632e-05		0.658126		WT HFHC 16w VS Chi3l1-/- HFHC 16w	0.17	ns	No
WT HFHC 0w M4	27.1933	12.2957	14.8977	3.27612e-05		0.493802		WT HFHC 0w VS WT HFHC 8w	0.198	ns	No
WT HFHC 8w M1	24.0942	12.4282	11.666	0.000307749		4.63863		WT HFHC 0w VS WT HFHC 16w	0.293	ns	No
WT HFHC 8w M2	25.4762	12.2822	13.1941	0.000106707		1.60837		WT HFHC 8w VS WT HFHC 16w	0.855	ns	No
WT HFHC 8w M3	26.2155	11.7911	14.4244	4.54802e-05		0.685513		Chi3l1-/- HFHC 0w VS Chi3l1-/- HFHC 8w	0.003	**	Yes
WT HFHC 8w M4	26.1872	11.9482	14.239	5.17164e-05		0.779509		Chi3l1-/- HFHC 0w VS Chi3l1-/- HFHC 16w	<0.001	***	Yes
WT HFHC 8w M5	24.0834	12.2938	11.7896	0.00028247		4.25761		Chi3l1-/- HFHC 8w VS Chi3l1-/- HFHC 16w	0.586	ns	No
WT HFHC 8w M6	27.188	13.3076	13.8804	6.63088e-05		0.999458
WT HFHC 8w M7	26.6575	12.6416	14.0159	6.03659e-05		0.909881
WT HFHC 16w M1	25.3928	13.0558	12.337	0.000193283		2.91332
WT HFHC 16w M2	25.9887	13.2303	12.7584	0.000144323		2.17535
WT HFHC 16w M3	25.7382	12.8269	12.9113	0.00012981		1.9566
WT HFHC 16w M4	26.0013	12.898	13.1034	0.000113631		1.71273
WT HFHC 16w M5	26.5408	11.6982	14.8426	3.40348e-05		0.512999
Chi3l1-/- HFHC 0w M1	22.8465	11.3608	11.4856	0.00034872		5.25618
Chi3l1-/- HFHC 0w M2	25.3168	11.7745	13.5423	8.38233e-05		1.26345
Chi3l1-/- HFHC 0w M3	25.4027	11.9176	13.485	8.72162e-05		1.31459
Chi3l1-/- HFHC 0w M4	24.3482	12.5584	11.7898	0.000282425		4.25693
Chi3l1-/- HFHC 0w M5	24.4873	12.6356	11.8517	0.000270572		4.07827
Chi3l1-/- HFHC 0w M6	24.3588	12.4007	11.958	0.000251346		3.78848
Chi3l1-/- HFHC 0w M7	24.6276	12.869	11.7587	0.00028859		4.34985
Chi3l1-/- HFHC 8w M1	26.0662	10.9191	15.1471	2.75588e-05		0.415388
Chi3l1-/- HFHC 8w M2	26.4869	12.427	14.0599	5.85523e-05		0.882546
Chi3l1-/- HFHC 8w M3	27.8912	13.0276	14.8636	3.35436e-05		0.505595
Chi3l1-/- HFHC 8w M4	25.1559	12.219	12.937	0.000127523		1.92212
Chi3l1-/- HFHC 8w M5	25.1676	12.5827	12.5849	0.000162765		2.45332
Chi3l1-/- HFHC 16w M1	26.7727	12.7725	14.0002	6.10268e-05		0.919844
Chi3l1-/- HFHC 16w M2	26.6815	12.8575	13.824	6.89541e-05		1.03933
Chi3l1-/- HFHC 16w M3	26.6153	12.4354	14.1799	5.38799e-05		0.81212
Chi3l1-/- HFHC 16w M4	26.4049	12.4587	13.9463	6.33505e-05		0.954869
Chi3l1-/- HFHC 16w M5	27.2014	13.0253	14.1761	5.40205e-05		0.814239
Chi3l1-/- HFHC 16w M6	27.3949	12.4996	14.8953	3.28147e-05		0.494609
Group	Chil3	18S	dCt	2^-ddCt	average	normalize		One-way analysis of variance (ANOVA)	P value	P value summary	Significantly different (P < 0.05)?
WT HFHC 0w M1	28.6787	12.041	16.6376	9.80781e-06	1.38148e-05	0.709949		WT HFHC 0w VS Chi3l1-/- HFHC 0w	0.812	ns	No
WT HFHC 0w M2	27.4564	11.9743	15.4821	2.18486e-05		1.58154		WT HFHC 8w VS Chi3l1-/- HFHC 8w	0.004	**	Yes
WT HFHC 0w M3	29.2329	12.8395	16.3934	1.16169e-05		0.840903		WT HFHC 16w VS Chi3l1-/- HFHC 16w	0.416	ns	No
WT HFHC 0w M4	29.0252	12.6769	16.3483	1.19859e-05		0.867612		WT HFHC 0w VS WT HFHC 8w	0.599	ns	No
WT HFHC 8w M1	30.4253	13.5819	16.8434	8.50393e-06		0.615566		WT HFHC 0w VS WT HFHC 16w	0.259	ns	No
WT HFHC 8w M2	29.8517	13.1504	16.7013	9.3842e-06		0.679285		WT HFHC 8w VS WT HFHC 16w	0.069	ns	No
WT HFHC 8w M3	30.3981	12.6033	17.7947	4.39803e-06		0.318356		Chi3l1-/- HFHC 0w VS Chi3l1-/- HFHC 8w	0.027	*	Yes
WT HFHC 8w M4	28.5105	12.8472	15.6634	1.92691e-05		1.39481		Chi3l1-/- HFHC 0w VS Chi3l1-/- HFHC 16w	0.053	ns	No
WT HFHC 8w M5	28.9899	12.6853	16.3046	1.23548e-05		0.894312		Chi3l1-/- HFHC 8w VS Chi3l1-/- HFHC 16w	0.692	ns	No
WT HFHC 8w M6	30.121	13.3869	16.734	9.17394e-06		0.664065
WT HFHC 8w M7	30.0223	13.3414	16.6808	9.51852e-06		0.689007
WT HFHC 16w M1	28.1847	12.5269	15.6579	1.93425e-05		1.40013
WT HFHC 16w M2	28.2447	12.7074	15.5373	2.1028e-05		1.52213
WT HFHC 16w M3	26.7078	11.9084	14.7994	3.5071e-05		2.53865
WT HFHC 16w M4	28.3523	12.3937	15.9586	1.57031e-05		1.13668
WT HFHC 16w M5	28.1354	12.3648	15.7706	1.7888e-05		1.29484
Chi3l1-/- HFHC 0w M1	29.7793	12.3591	17.4202	5.70147e-06		0.412707
Chi3l1-/- HFHC 0w M2	29.8308	12.113	17.7177	4.63902e-06		0.3358
Chi3l1-/- HFHC 0w M3	27.4582	12.4564	15.0018	3.048e-05		2.20633
Chi3l1-/- HFHC 0w M4	27.3647	12.5821	14.7826	3.54804e-05		2.56828
Chi3l1-/- HFHC 0w M5	28.9092	12.9104	15.9987	1.52724e-05		1.10551
Chi3l1-/- HFHC 0w M6	29.0656	12.654	16.4117	1.14709e-05		0.830333
Chi3l1-/- HFHC 0w M7	30.2789	12.525	17.7539	4.52409e-06		0.327481
Chi3l1-/- HFHC 8w M1	26.4244	11.958	14.4663	4.41777e-05		3.19785
Chi3l1-/- HFHC 8w M2	26.2413	11.8799	14.3614	4.75108e-05		3.43912
Chi3l1-/- HFHC 8w M3	28.2868	13.1112	15.1756	2.70204e-05		1.9559
Chi3l1-/- HFHC 8w M4	28.3968	12.9454	15.4514	2.23184e-05		1.61554
Chi3l1-/- HFHC 8w M5	29.786	12.5257	17.2603	6.36996e-06		0.461096
Chi3l1-/- HFHC 16w M1	27.6517	12.0654	15.5863	2.03257e-05		1.4713
Chi3l1-/- HFHC 16w M2	27.8056	12.165	15.6406	1.95756e-05		1.417
Chi3l1-/- HFHC 16w M3	28.1137	13.3518	14.7619	3.59924e-05		2.60535
Chi3l1-/- HFHC 16w M4	28.0442	13.479	14.5652	4.12526e-05		2.98611
Chi3l1-/- HFHC 16w M5	28.2325	12.9202	15.3124	2.45765e-05		1.77899
Chi3l1-/- HFHC 16w M6	28.7995	13.1994	15.6002	2.01318e-05		1.45726
Group	FIZZ1	18S	dCt	2^-ddCt	average	normalize		One-way analysis of variance (ANOVA)	P value	P value summary	Significantly different (P < 0.05)?
WT HFHC 0w M1	30.0188	12.0879	17.9309	4.00175e-06	8.70216e-06	0.459857		WT HFHC 0w VS Chi3l1-/- HFHC 0w	0.49	ns	No
WT HFHC 0w M2	28.8283	12.8395	15.9888	1.5378e-05		1.76714		WT HFHC 8w VS Chi3l1-/- HFHC 8w	0.104	ns	No
WT HFHC 0w M3	28.8829	12.6769	16.2061	1.32279e-05		1.52007		WT HFHC 16w VS Chi3l1-/- HFHC 16w	0.669	ns	No
WT HFHC 0w M4	29.8436	11.9743	17.8693	4.17644e-06		0.479932		WT HFHC 0w VS WT HFHC 8w	0.127	ns	No
WT HFHC 8w M1	31.2964	13.4823	17.8141	4.33935e-06		0.498652		WT HFHC 0w VS WT HFHC 16w	0.032	*	Yes
WT HFHC 8w M2	30.8066	13.5819	17.2247	6.52922e-06		0.750299		WT HFHC 8w VS WT HFHC 16w	0.376	ns	No
WT HFHC 8w M3	29.6882	13.1504	16.5378	1.05105e-05		1.2078		Chi3l1-/- HFHC 0w VS Chi3l1-/- HFHC 8w	0.014	*	Yes
WT HFHC 8w M4	30.4277	12.6033	17.8243	4.30861e-06		0.49512		Chi3l1-/- HFHC 0w VS Chi3l1-/- HFHC 16w	0.155	ns	No
WT HFHC 8w M5	29.7594	12.8472	16.9122	8.10822e-06		0.931749		Chi3l1-/- HFHC 8w VS Chi3l1-/- HFHC 16w	0.244	ns	No
WT HFHC 8w M6	30.2912	12.6853	17.6058	5.01321e-06		0.576088
WT HFHC 8w M7	31.9102	13.3414	18.5688	2.5718e-06		0.295535
WT HFHC 16w M1	31.0916	12.5269	18.5647	2.57905e-06		0.296369
WT HFHC 16w M2	30.2808	11.9084	18.3723	2.94696e-06		0.338647
WT HFHC 16w M3	29.7044	12.4377	17.2667	6.34156e-06		0.728734
WT HFHC 16w M4	29.7852	11.6227	18.1625	3.40832e-06		0.391664
WT HFHC 16w M5	29.393	11.9264	17.4666	5.52106e-06		0.634448
Chi3l1-/- HFHC 0w M1	29.7045	12.3591	17.3454	6.00493e-06		0.690051
Chi3l1-/- HFHC 0w M2	29.9903	12.113	17.8773	4.15328e-06		0.47727
Chi3l1-/- HFHC 0w M3	29.079	12.4564	16.6226	9.91091e-06		1.1389
Chi3l1-/- HFHC 0w M4	29.4204	12.9104	16.5099	1.07155e-05		1.23136
Chi3l1-/- HFHC 0w M5	29.3345	12.654	16.6805	9.52059e-06		1.09405
Chi3l1-/- HFHC 0w M6	28.6924	12.2375	16.4549	1.11323e-05		1.27926
Chi3l1-/- HFHC 0w M7	31.4637	12.9702	18.4935	2.70952e-06		0.311362
Chi3l1-/- HFHC 8w M1	31.3621	11.2833	20.0788	9.03005e-07		0.103768
Chi3l1-/- HFHC 8w M2	31.5442	12.5051	19.0391	1.8563e-06		0.213314
Chi3l1-/- HFHC 8w M3	31.6828	12.5189	19.1639	1.70254e-06		0.195646
Chi3l1-/- HFHC 8w M4	31.877	11.9045	19.9725	9.72025e-07		0.111699
Chi3l1-/- HFHC 8w M5	29.0772	12.0966	16.9806	7.7328e-06		0.888607
Chi3l1-/- HFHC 16w M1	29.3959	12.7055	16.6904	9.45561e-06		1.08658
Chi3l1-/- HFHC 16w M2	29.0766	12.165	16.9117	8.11119e-06		0.93209
Chi3l1-/- HFHC 16w M3	31.3499	13.3518	17.9982	3.81954e-06		0.438919
Chi3l1-/- HFHC 16w M4	31.3153	13.479	17.8363	4.27312e-06		0.491041
Chi3l1-/- HFHC 16w M5	31.7679	12.9202	18.8478	2.11961e-06		0.243573
Chi3l1-/- HFHC 16w M6	31.8658	13.1994	18.6665	2.40346e-06		0.276192
Group	ARG1	18S	dCt	2^-ddCt	average	normalize		One-way analysis of variance (ANOVA)	P value	P value summary	Significantly different (P < 0.05)?
WT HFHC 0w M1	23.5926	12.0879	11.5047	0.00034414	0.000427758	0.804521		WT HFHC 0w VS Chi3l1-/- HFHC 0w	0.336	ns	No
WT HFHC 0w M2	23.0434	11.7626	11.2807	0.000401943		0.939651		WT HFHC 8w VS Chi3l1-/- HFHC 8w	0.001	**	Yes
WT HFHC 0w M3	23.9729	12.8395	11.1334	0.000445155		1.04067		WT HFHC 16w VS Chi3l1-/- HFHC 16w	<0.001	***	Yes
WT HFHC 0w M4	23.8397	12.6769	11.1628	0.000436176		1.01968		WT HFHC 0w VS WT HFHC 8w	0.366	ns	No
WT HFHC 8w M1	25.9069	13.4823	12.4246	0.000181897		0.425233		WT HFHC 0w VS WT HFHC 16w	0.488	ns	No
WT HFHC 8w M2	25.8567	13.5819	12.2748	0.000201793		0.471747		WT HFHC 8w VS WT HFHC 16w	0.86	ns	No
WT HFHC 8w M3	23.8542	12.6033	11.2508	0.000410359		0.959325		Chi3l1-/- HFHC 0w VS Chi3l1-/- HFHC 8w	0.001	**	Yes
WT HFHC 8w M4	24.8783	12.8472	12.0311	0.000238927		0.558556		Chi3l1-/- HFHC 0w VS Chi3l1-/- HFHC 16w	<0.001	***	Yes
WT HFHC 8w M5	24.9793	12.6853	12.294	0.000199136		0.465533		Chi3l1-/- HFHC 8w VS Chi3l1-/- HFHC 16w	0.31	ns	No
WT HFHC 8w M6	24.8908	13.3869	11.5039	0.000344346		0.805001
WT HFHC 8w M7	25.3238	13.3414	11.9823	0.000247148		0.577774
WT HFHC 16w M1	23.9806	11.9084	12.0721	0.000232234		0.54291
WT HFHC 16w M2	24.0695	12.4377	11.6318	0.000315131		0.736704
WT HFHC 16w M3	23.0622	12.3648	10.6974	0.000602219		1.40785
WT HFHC 16w M4	23.8625	10.9207	12.9418	0.000127097		0.297123
WT HFHC 16w M5	24.5492	11.9264	12.6228	0.000158544		0.37064
Chi3l1-/- HFHC 0w M1	23.387	12.113	11.274	0.000403831		0.944065
Chi3l1-/- HFHC 0w M2	24.545	12.4564	12.0886	0.000229606		0.536766
Chi3l1-/- HFHC 0w M3	24.6979	12.5821	12.1158	0.000225315		0.526734
Chi3l1-/- HFHC 0w M4	25.6051	12.9104	12.6947	0.000150843		0.352637
Chi3l1-/- HFHC 0w M5	24.318	12.2375	12.0805	0.000230895		0.539779
Chi3l1-/- HFHC 0w M6	24.4212	12.525	11.8962	0.000262356		0.613327
Chi3l1-/- HFHC 0w M7	24.9102	12.9702	11.9399	0.000254518		0.595005
Chi3l1-/- HFHC 8w M1	21.5653	11.2833	10.282	0.000803165		1.87761
Chi3l1-/- HFHC 8w M2	21.7847	12.5189	9.26583	0.00162445		3.7976
Chi3l1-/- HFHC 8w M3	21.8721	11.9045	9.96761	0.000998734		2.33481
Chi3l1-/- HFHC 8w M4	24.3906	12.0966	12.2941	0.000199123		0.465503
Chi3l1-/- HFHC 8w M5	24.1521	12.5257	11.6264	0.000316298		0.739432
Chi3l1-/- HFHC 16w M1	22.4391	12.9163	9.52276	0.00135945		3.17808
Chi3l1-/- HFHC 16w M2	22.6466	12.2788	10.3678	0.000756791		1.7692
Chi3l1-/- HFHC 16w M3	23.2587	13.3518	9.90694	0.00104163		2.43509
Chi3l1-/- HFHC 16w M4	23.8217	13.479	10.3427	0.000770075		1.80026
Chi3l1-/- HFHC 16w M5	23.1561	12.9202	10.2359	0.000829235		1.93856
Chi3l1-/- HFHC 16w M6	23.2766	13.1994	10.0772	0.000925668		2.164
Group	MRC1	18S	dCt	2^-ddCt	average	normalize		One-way analysis of variance (ANOVA)	P value	P value summary	Significantly different (P < 0.05)?
WT HFHC 0w M1	25.4587	11.9101	13.5486	8.34555e-05	0.000125308	0.666006		WT HFHC 0w VS Chi3l1-/- HFHC 0w	0.745	ns	No
WT HFHC 0w M2	25.2916	11.9497	13.3418	9.63178e-05		0.768651		WT HFHC 8w VS Chi3l1-/- HFHC 8w	0.006	**	Yes
WT HFHC 0w M3	25.1238	12.0266	13.0971	0.000114121		0.910728		WT HFHC 16w VS Chi3l1-/- HFHC 16w	<0.001	***	Yes
WT HFHC 0w M4	24.877	12.0381	12.8389	0.000136494		1.08927		WT HFHC 0w VS WT HFHC 8w	0.002	**	Yes
WT HFHC 8w M1	23.7343	12.2822	11.4521	0.000356913		2.8483		WT HFHC 0w VS WT HFHC 16w	0.051	ns	No
WT HFHC 8w M2	23.985	11.7911	12.1939	0.000213431		1.70326		WT HFHC 8w VS WT HFHC 16w	0.172	ns	No
WT HFHC 8w M3	24.0742	11.9482	12.1261	0.000223713		1.78532		Chi3l1-/- HFHC 0w VS Chi3l1-/- HFHC 8w	0.7	ns	No
WT HFHC 8w M4	23.9007	12.2938	11.6069	0.0003206		2.5585		Chi3l1-/- HFHC 0w VS Chi3l1-/- HFHC 16w	<0.001	***	Yes
WT HFHC 8w M5	24.4057	12.9768	11.4288	0.000362725		2.89468		Chi3l1-/- HFHC 8w VS Chi3l1-/- HFHC 16w	<0.001	***	Yes
WT HFHC 8w M6	24.8704	13.3076	11.5628	0.000330556		2.63796
WT HFHC 8w M7	24.9146	12.6416	12.2729	0.000202058		1.6125
WT HFHC 16w M1	25.0208	12.8269	12.1939	0.000213437		1.70331
WT HFHC 16w M2	24.954	12.898	12.0561	0.000234833		1.87405
WT HFHC 16w M3	24.6013	12.29	12.3113	0.00019676		1.57021
WT HFHC 16w M4	24.5953	12.4899	12.1053	0.000226952		1.81116
WT HFHC 16w M5	23.2256	11.1209	12.1047	0.000227048		1.81192
Chi3l1-/- HFHC 0w M1	24.4193	11.9507	12.4685	0.00017644		1.40806
Chi3l1-/- HFHC 0w M2	24.2971	11.3608	12.9362	0.000127585		1.01818
Chi3l1-/- HFHC 0w M3	23.641	11.7745	11.8665	0.000267807		2.1372
Chi3l1-/- HFHC 0w M4	26.445	12.5584	13.8867	6.60232e-05		0.526889
Chi3l1-/- HFHC 0w M5	26.1492	12.6356	13.5136	8.55092e-05		0.682395
Chi3l1-/- HFHC 0w M6	26.0269	12.4007	13.6262	7.90859e-05		0.631134
Chi3l1-/- HFHC 0w M7	26.69	12.869	13.821	6.90966e-05		0.551416
Chi3l1-/- HFHC 8w M1	24.2669	9.98506	14.2818	5.02039e-05		0.400645
Chi3l1-/- HFHC 8w M2	24.3432	10.9191	13.4241	9.09808e-05		0.72606
Chi3l1-/- HFHC 8w M3	25.4538	12.427	13.0268	0.000119821		0.956217
Chi3l1-/- HFHC 8w M4	24.6552	13.0276	11.6276	0.000316048		2.52218
Chi3l1-/- HFHC 8w M5	25.0333	12.219	12.8143	0.000138834		1.10795
Chi3l1-/- HFHC 16w M1	23.1996	12.7725	10.4271	0.000726305		5.79618
Chi3l1-/- HFHC 16w M2	23.6546	12.8575	10.7971	0.000562022		4.48514
Chi3l1-/- HFHC 16w M3	23.4814	12.4354	11.0461	0.000472941		3.77425
Chi3l1-/- HFHC 16w M4	23.5197	12.4587	11.0611	0.000468049		3.7352
Chi3l1-/- HFHC 16w M5	24.0348	13.0253	11.0095	0.000485081		3.87113
Chi3l1-/- HFHC 16w M6	24.0011	12.4996	11.5015	0.000344917		2.75256
