# Supplementary material for: Hyperactivated glycolysis drives spatially patterned Kupffer cell depletion in MASLD
Source: eLife. 2026 May 26;14:RP109206. doi: 10.7554/eLife.109206 (PMC13211875; doi:10.7554/eLife.109206)
Supplement: Figure 5—figure supplement 2—source data 1. [file elife-109206-fig5-figsupp2-data1.xlsx]

## Sheet: Figure S2A
Name	Chi3l1-/-_1	Chi3l1-/-_2	Chi3l1-/-_3	Chi3l1-/-_4	Chi3l1-/-_5	Chi3l1-/-_6	Chi3l1-/-+rChi3l1_1	Chi3l1-/-+rChi3l1_2	Chi3l1-/-+rChi3l1_3	Chi3l1-/-+rChi3l1_4	Chi3l1-/-+rChi3l1_5	Chi3l1-/-+rChi3l1_6
2-Phosphoglyceric acid m0	1.77093e+06	8.40113e+06	6.00121e+06	2.04365e+06	1.52809e+06	1.09642e+06	1.5574e+06	1.81995e+06	1.26382e+06	1.27218e+06	1.629e+06	1.19415e+06
2-Phosphoglyceric acid m1	0	61008.7	0	0	0	0	0	0	0	0	0	0
2-Phosphoglyceric acid m2	0	0	0	0	0	0	0	0	0	0	0	0
2-Phosphoglyceric acid m3	413233	1.18808e+06	1.72997e+06	430272	820629	219035	118960	107940	67282.7	83359.8	114464	61381.4
3-Phosphoglyceric acid m0	1.76982e+06	8.36732e+06	5.95379e+06	2.05896e+06	1.52804e+06	1.09601e+06	1.54969e+06	1.80755e+06	1.25832e+06	1.27044e+06	1.629e+06	1.18965e+06
3-Phosphoglyceric acid m1	0	62221.9	0	0	0	0	0	0	0	0	0	0
3-Phosphoglyceric acid m2	0	0	0	0	0	0	0	0	0	0	0	0
3-Phosphoglyceric acid m3	413340	1.24255e+06	1.73041e+06	436258	820629	219035	118964	110438	69834.5	85760.1	114464	66388.1
Dihydroxyacetone phosphate m0	2425.63	27607.8	17993.2	27694.7	22777.5	17062.2	0	0	0	2702.13	8225.78	0
Dihydroxyacetone phosphate m1	0	0	0	0	0	0	0	0	0	0	0	0
Dihydroxyacetone phosphate m2	0	0	0	0	0	0	0	0	0	0	0	0
Dihydroxyacetone phosphate m3	0	0	130450	98985.5	92413	106785	2886.11	0	0	2618.91	0	1087.62
F16P m0	192891	134087	450276	374923	708858	494652	129746	158108	148250	137337	130579	102528
F16P m1	0	0	0	0	0	0	0	0	0	0	0	0
F16P m2	0	0	0	0	0	0	0	0	0	0	0	0
F16P m3	0	0	0	0	0	0	0	0	0	0	0	0
F16P m4	0	0	0	0	0	0	0	0	0	0	0	0
F16P m5	0	0	0	0	0	0	0	0	0	0	0	0
F16P m6	0	0	0	0	0	0	0	0	0	0	0	0
Fructose 6-phosphate m0	580172	365758	718418	319466	305049	307641	488577	688078	584553	495785	669395	584854
Fructose 6-phosphate m1	116224	39452.8	153312	42.4573	49164.3	35338.3	101040	117997	152979	96055.2	150904	131255
Fructose 6-phosphate m2	58769.9	16817.3	111792	14060.3	81788.4	47474.9	71995.9	113865	57802.3	49251.8	74625.6	60829.6
Fructose 6-phosphate m3	102308	15736.2	179039	26116.7	92426.4	45001.2	36512.1	94171.9	91081.6	58329.6	82953	80957.6
Fructose 6-phosphate m4	26398.4	8358.3	42189.3	8698.82	31860.6	11569.3	17018.5	18831.5	11905	10131.9	12174.1	10274.3
Fructose 6-phosphate m5	0	0	0	0	0	0	0	0	0	0	0	0
Fructose 6-phosphate m6	117449	84948.8	341094	267330	148809	129578	0	10117.8	2034.63	0	16512.1	3582.92
Glucose 6-phosphate m0	3.3587e+06	1.88166e+06	2.91703e+06	2.18066e+06	2.65748e+06	2.62583e+06	2.16624e+06	2.40568e+06	2.41418e+06	1.97621e+06	2.58873e+06	2.42839e+06
Glucose 6-phosphate m1	468415	271148	504474	90175.6	260658	140274	425780	474015	532019	357492	604198	453435
Glucose 6-phosphate m2	278098	64264.4	267480	33751.6	235394	95150.4	258029	352173	293723	273881	328014	285464
Glucose 6-phosphate m3	382806	148048	430693	78569.4	379320	144080	198974	323611	329196	265586	345968	281232
Glucose 6-phosphate m4	140181	40474.3	122825	29200.2	168498	72412.6	89283.7	101925	85557.6	90704.3	108744	78701.8
Glucose 6-phosphate m5	27735.4	2051.6	24822.3	2970.79	80734.7	26879.9	7817.53	19458.4	9520.01	12416.7	29570.5	25532.1
Glucose 6-phosphate m6	57174.7	60928.1	122802	146069	191433	229601	29746.1	24391.3	26491.2	23717.3	16600.3	23561.9
Glucose m0	1.38225e+07	1.42892e+07	1.81484e+07	1.64265e+07	1.61792e+07	1.32953e+07	1.40445e+07	1.37744e+07	1.34047e+07	8.95002e+06	9.23869e+06	1.16552e+07
Glucose m1	0	0	0	0	0	0	0	0	0	0	0	0
Glucose m2	0	0	0	0	0	0	0	0	0	0	0	0
Glucose m3	30515.4	32015.3	109764	100957	98733.2	68807.6	135435	111531	133798	61420.6	80186.1	88329.8
Glucose m4	22378.3	18101.7	78724.3	43578.2	35674.5	56415.1	22622.8	10231.5	4343.98	3978.41	5906.02	3590.66
Glucose m5	90962.8	86378.5	170662	148576	163134	111878	59365.9	42517.2	64499	37860.7	35503.4	38265
Glucose m6	1.29669e+06	1.38958e+06	2.29187e+06	1.90419e+06	1.97424e+06	1.67001e+06	658758	616556	608121	431518	406628	500252
Lactic acid m0	2.2528e+08	3.25481e+08	2.85533e+08	2.64769e+08	2.48637e+08	2.12012e+08	2.10549e+08	2.19461e+08	1.95365e+08	2.05302e+08	1.64405e+08	2.31132e+08
Lactic acid m1	3.26349e+06	1.05491e+07	7.70415e+06	8.68158e+06	4.14347e+06	6.94185e+06	1.95091e+06	3.02236e+06	3.03202e+06	2.867e+06	1.95876e+06	1.96198e+06
Lactic acid m2	5.56872e+06	1.33235e+07	1.41599e+07	1.564e+07	1.05661e+07	1.63335e+07	2.89749e+06	2.6866e+06	2.39641e+06	2.32388e+06	1.95491e+06	2.67138e+06
Lactic acid m3	8.4812e+07	1.22146e+08	2.9462e+08	2.79553e+08	2.20233e+08	2.40798e+08	1.82417e+07	1.51944e+07	1.37745e+07	1.35143e+07	1.13511e+07	1.40835e+07
Phosphoenolpyruvic acid m0	313070	2.36369e+06	676240	237168	213425	123838	284465	278958	162257	166006	270800	144575
Phosphoenolpyruvic acid m1	0	0	0	0	0	0	0	0	0	0	0	0
Phosphoenolpyruvic acid m2	0	0	0	0	0	0	0	0	0	0	0	0
Phosphoenolpyruvic acid m3	97166.9	377400	256511	79998.7	193348	23271.3	12981	23377.8	10360	9238.56	27354.1	11190.8
Pyruvic acid m0	7.39746e+07	8.01059e+07	6.93621e+07	5.60438e+07	9.00008e+07	4.43946e+07	4.72807e+07	4.74056e+07	4.68829e+07	4.21984e+07	4.31608e+07	5.60027e+07
Pyruvic acid m1	0	177956	0	0	0	0	0	0	0	0	0	0
Pyruvic acid m2	378459	624209	392507	319722	549359	258351	205577	264560	219112	209498	216998	302268
Pyruvic acid m3	750959	963190	1.03979e+06	638104	1.52424e+06	448214	200283	196346	184399	158606	195145	280335
Ribose-5-phosphate m0	1.03596e+07	2.83206e+06	9.62224e+06	7.96455e+06	1.10194e+07	7.96327e+06	6.41045e+06	5.90324e+06	5.61874e+06	6.93421e+06	6.01199e+06	5.22659e+06
Ribose-5-phosphate m1	0	0	6377.22	0	0	0	0	0	0	0	0	0
Ribose-5-phosphate m2	0	0	0	0	0	0	0	1978.04	3429.04	0	11424.8	0
Ribose-5-phosphate m3	40414.6	2383.7	207828	49362.2	101493	49661.8	35280.7	39156.6	40186.2	28716.7	30447.9	32330.6
Ribose-5-phosphate m4	35317.6	0	97592.1	56183.8	81258	45800.7	26730.8	36136.6	40552.9	56388.7	33029.9	33780.9
Ribose-5-phosphate m5	580452	124042	871692	635576	967020	666477	512650	489164	436390	565866	463185	398158
Ribulose-5-phosphate m0	1.04288e+07	2.82674e+06	9.56118e+06	7.92488e+06	1.09659e+07	7.90289e+06	6.4066e+06	5.92399e+06	5.63092e+06	6.95327e+06	6.01131e+06	5.2186e+06
Ribulose-5-phosphate m1	0	0	9947.2	0	0	0	0	0	0	0	0	0
Ribulose-5-phosphate m2	0	0	0	0	0	0	0	1615.64	3216.19	0	11436.7	0
Ribulose-5-phosphate m3	40349.5	2388.73	207825	49399.6	101623	49718.6	35284.3	39150.2	40182.5	28698.7	30448.1	32338.1
Ribulose-5-phosphate m4	35309.9	0	92964.1	56188.2	81261.9	45807.4	26731.2	36140	40554.9	56386.5	33029.8	33781.8
Ribulose-5-phosphate m5	574116	124042	866587	635575	965621	664962	512650	489164	436391	565866	463185	398158
Sedoheptulose 7-phosphate m0	1.41593e+06	956068	992397	1.3955e+06	748413	1.39896e+06	1.47776e+06	1.4429e+06	1.35904e+06	1.41622e+06	1.4116e+06	1.01302e+06
Sedoheptulose 7-phosphate m1	132710	93676.9	134813	189065	103646	206542	173282	188886	164804	159998	179258	104087
Sedoheptulose 7-phosphate m2	153406	55731.9	108960	137146	193877	278257	205893	169651	142493	188490	157720	135819
Sedoheptulose 7-phosphate m3	49175.2	11114.4	49130.6	37469.1	35715.1	49472.5	25752.7	14342.9	13972.8	27294.6	46369.3	15854.3
Sedoheptulose 7-phosphate m4	54509.2	22358.9	15466.5	36837.1	29621.6	69107.4	62199.8	44639.8	52331.2	51728.4	53439.7	33642.1
Sedoheptulose 7-phosphate m5	89636.8	32396.6	70910.1	98740.8	101110	131196	52349.2	71790.8	50978.3	77167.2	56178.2	52152.5
Sedoheptulose 7-phosphate m6	0	0	0	0	0	0	0	0	0	0	0	0
Sedoheptulose 7-phosphate m7	0	0	0	0	0	0	0	0	0	0	0	0

## Sheet: Figure S2B
Name	Chi3l1-/-_1	Chi3l1-/-_2	Chi3l1-/-_3	Chi3l1-/-_4	Chi3l1-/-_5	Chi3l1-/-_6	Chi3l1-/-+rChi3l1_1	Chi3l1-/-+rChi3l1_2	Chi3l1-/-+rChi3l1_3	Chi3l1-/-+rChi3l1_4	Chi3l1-/-+rChi3l1_5	Chi3l1-/-+rChi3l1_6
2-Phosphoglyceric acid	413233	1.24909e+06	1.72997e+06	430272	820629	219035	118960	107940	67282.7	83359.8	114464	61381.4
3-Phosphoglyceric acid	413340	1.30477e+06	1.73041e+06	436258	820629	219035	118964	110438	69834.5	85760.1	114464	66388.1
Dihydroxyacetone phosphate	0	0	130450	98985.5	92413	106785	2886.11	0	0	2618.91	0	1087.62
F16P	0	0	0	0	0	0	0	0	0	0	0	0
Fructose 6-phosphate	421150	165313	827427	316249	404049	268962	226567	354983	315802	213768	337168	286899
Glucose 6-phosphate	1.35441e+06	586914	1.4731e+06	380736	1.31604e+06	708399	1.00963e+06	1.29557e+06	1.27651e+06	1.0238e+06	1.43309e+06	1.14793e+06
Glucose	1.44055e+06	1.52608e+06	2.65102e+06	2.1973e+06	2.27178e+06	1.90711e+06	876182	780836	810762	534778	528223	630438
Lactic acid	9.36442e+07	1.46018e+08	3.16484e+08	3.03875e+08	2.34943e+08	2.64073e+08	2.30901e+07	2.09034e+07	1.92029e+07	1.87052e+07	1.52648e+07	1.87168e+07
Phosphoenolpyruvic acid	97166.9	377400	256511	79998.7	193348	23271.3	12981	23377.8	10360	9238.56	27354.1	11190.8
Pyruvic acid	1.12942e+06	1.76536e+06	1.4323e+06	957826	2.0736e+06	706565	405859	460906	403511	368104	412143	582603
Ribose-5-phosphate	656184	126426	1.18349e+06	741122	1.14977e+06	761939	574661	566436	520559	650971	538087	464270
Ribulose-5-phosphate	649776	126431	1.17732e+06	741163	1.14851e+06	760488	574665	566070	520344	650951	538099	464278
Sedoheptulose 7-phosphate	479437	215279	379280	499259	463970	734575	519477	489311	424580	504679	492965	341555

## Sheet: Figure S2C
GLC
Group	M+0	M+1	M+2	M+3	M+4	M+5	M+6			t` test	P value	P value summary	Significantly different (P < 0.05)?
Chi3l1-/-	90.5619	0	0	0.199929	0.146617	0.595966	8.49561			M+0	<0.001	***	Yes
Chi3l1-/-	90.3506	0	0	0.202433	0.114457	0.546173	8.78635			M+1	0	ns	No
Chi3l1-/-	87.2544	0	0	0.527726	0.378492	0.820512	11.0189			M+2	0	ns	No
Chi3l1-/-	88.2016	0	0	0.542086	0.233993	0.797778	10.2245			M+3	0.001	**	Yes
Chi3l1-/-	87.6875	0	0	0.535112	0.193348	0.884151	10.6999			M+4	0.01	*	Yes
Chi3l1-/-	87.4552	0	0	0.45261	0.371092	0.735923	10.9852			M+5	<0.001	***	Yes
Chi3l1-/-+rChi3l1	94.1	0	0	0.9	0.2	0.4	4.4			M+6	<0.001	***	Yes
Chi3l1-/-+rChi3l1	94.6	0	0	0.8	0.07	0.3	4.2
Chi3l1-/-+rChi3l1	94.3	0	0	0.9	0.03	0.5	4.3
Chi3l1-/-+rChi3l1	94.4	0	0	0.6	0.04	0.4	4.5
Chi3l1-/-+rChi3l1	94.6	0	0	0.8	0.06	0.4	4.2
Chi3l1-/-+rChi3l1	94.9	0	0	0.7	0.03	0.3	4.1
2PA
Group	M+0	M+1	M+2	M+3						t` test	P value	P value summary	Significantly different (P < 0.05)?
Chi3l1-/-	81.0805	0	0	18.9195						M+0	0.001	**	Yes
Chi3l1-/-	87.0563	0.6322	0	12.3115						M+1	0.341	ns	No
Chi3l1-/-	77.6234	0	0	22.3766						M+2	0	ns	No
Chi3l1-/-	82.6077	0	0	17.3923						M+3	0.001	**	Yes
Chi3l1-/-	65.0606	0	0	34.9394
Chi3l1-/-	83.3491	0	0	16.6509
Chi3l1-/-+rChi3l1	92.9	0	0	7.1
Chi3l1-/-+rChi3l1	94.4	0	0	5.6
Chi3l1-/-+rChi3l1	94.9	0	0	5.1
Chi3l1-/-+rChi3l1	93.9	0	0	6.1
Chi3l1-/-+rChi3l1	93.4	0	0	6.6
Chi3l1-/-+rChi3l1	95.1	0	0	4.9
3PA
Group	M+0	M+1	M+2	M+3						t` test	P value	P value summary	Significantly different (P < 0.05)?
Chi3l1-/-	81.0669	0	0	18.9331						M+0	0.001	**	Yes
Chi3l1-/-	86.5099	0.643314	0	12.8468						M+1	0.341	ns	No
Chi3l1-/-	77.4809	0	0	22.5191						M+2	0	ns	No
Chi3l1-/-	82.5163	0	0	17.4837						M+3	0.001	**	Yes
Chi3l1-/-	65.0598	0	0	34.9402
Chi3l1-/-	83.3439	0	0	16.6561
Chi3l1-/-+rChi3l1	92.9	0	0	7.1
Chi3l1-/-+rChi3l1	94.2	0	0	5.8
Chi3l1-/-+rChi3l1	94.7	0	0	5.3
Chi3l1-/-+rChi3l1	93.7	0	0	6.3
Chi3l1-/-+rChi3l1	93.4	0	0	6.6
Chi3l1-/-+rChi3l1	94.7	0	0	5.3
DP
Group	M+0	M+1	M+2	M+3						t` test	P value	P value summary	Significantly different (P < 0.05)?
Chi3l1-/-	100	0	0	0						M+0	0.818	ns	No
Chi3l1-/-	100	0		0						M+3	0.818	ns	No
Chi3l1-/-	12.1213	0	0	87.8787
Chi3l1-/-	21.8619	0	0	78.1381
Chi3l1-/-	19.7737	0	0	80.2263
Chi3l1-/-	13.7768	0	0	86.2232
Chi3l1-/-+rChi3l1	0	0	0	100
Chi3l1-/-+rChi3l1		0	0
Chi3l1-/-+rChi3l1		0	0
Chi3l1-/-+rChi3l1	50.8	0	0	49.2
Chi3l1-/-+rChi3l1	100	0	0	0
Chi3l1-/-+rChi3l1	0	0	0	100
FBP
Group	M+0	M+1	M+2	M+3	M+4	M+5	M+6			t` test	P value	P value summary	Significantly different (P < 0.05)?
Chi3l1-/-	100	0	0	0	0	0	0			M+0	0	ns	No
Chi3l1-/-	100	0	0	0	0	0	0			M+1	0	ns	No
Chi3l1-/-	100	0	0	0	0	0	0			M+2	0	ns	No
Chi3l1-/-	100	0	0	0	0	0	0			M+3	0	ns	No
Chi3l1-/-	100	0	0	0	0	0	0			M+4	0	ns	No
Chi3l1-/-	100	0	0	0	0	0	0			M+5	0	ns	No
Chi3l1-/-+rChi3l1	100	0	0	0	0	0	0			M+6	0	ns	No
Chi3l1-/-+rChi3l1	100	0	0	0	0	0	0
Chi3l1-/-+rChi3l1	100	0	0	0	0	0	0
Chi3l1-/-+rChi3l1	100	0	0	0	0	0	0
Chi3l1-/-+rChi3l1	100	0	0	0	0	0	0
Chi3l1-/-+rChi3l1	100	0	0	0	0	0	0
F6P
Group	M+0	M+1	M+2	M+3	M+4	M+5	M+6			t` test	P value	P value summary	Significantly different (P < 0.05)?
Chi3l1-/-	57.9406	11.607	5.86923	10.2173	2.63635	0	11.7294			M+0	0.005	**	Yes
Chi3l1-/-	68.8717	7.4289	3.16667	2.96311	1.57386	0	15.9957			M+1	0.002	**	Yes
Chi3l1-/-	46.4741	9.91771	7.23176	11.582	2.72921	0	22.0652			M+2	0.301	ns	No
Chi3l1-/-	50.2531	0.006679	2.21173	4.10824	1.36835	0	42.0519			M+3	0.986	ns	No
Chi3l1-/-	43.0193	6.93336	11.5342	13.0344	4.49312	0	20.9857			M+4	0.097	ns	No
Chi3l1-/-	53.354	6.12871	8.23356	7.80453	2.00645	0	22.4727			M+5	0	ns	No
Chi3l1-/-+rChi3l1	68.3	14.1	10.1	5.1	2.4	0	0			M+6	<0.001	***	Yes
Chi3l1-/-+rChi3l1	66	11.3	10.9	9	1.8	0	1
Chi3l1-/-+rChi3l1	64.9	17	6.4	10.1	1.3	0	0.2
Chi3l1-/-+rChi3l1	69.9	13.5	6.9	8.2	1.4	0	0
Chi3l1-/-+rChi3l1	66.5	15	7.4	8.2	1.2	0	1.6
Chi3l1-/-+rChi3l1	67.1	15.1	7	9.3	1.2	0	0.4
G6P
Group	M+0	M+1	M+2	M+3	M+4	M+5	M+6			t` test	P value	P value summary	Significantly different (P < 0.05)?
Chi3l1-/-	71.2629	9.93855	5.90053	8.12215	2.97427	0.588474	1.2131			M+0	0.026	*	Yes
Chi3l1-/-	76.2246	10.984	2.6033	5.9973	1.63958	0.083109	2.46815			M+1	0.004	**	Yes
Chi3l1-/-	66.4452	11.4911	6.09276	9.81049	2.79775	0.565412	2.79723			M+2	0.001	**	Yes
Chi3l1-/-	85.1356	3.52056	1.3177	3.06745	1.14001	0.115983	5.7027			M+3	0.273	ns	No
Chi3l1-/-	66.8798	6.55988	5.92407	9.54619	4.24052	2.03182	4.81772			M+4	0.771	ns	No
Chi3l1-/-	78.7537	4.2071	2.85374	4.32125	2.17179	0.80618	6.88619			M+5	0.462	ns	No
Chi3l1-/-+rChi3l1	68.2	13.4	8.1	6.3	2.8	0.2	0.9			M+6	0.004	**	Yes
Chi3l1-/-+rChi3l1	65	12.8	9.5	8.7	2.8	0.5	0.7
Chi3l1-/-+rChi3l1	65.4	14.4	8	8.9	2.3	0.3	0.7
Chi3l1-/-+rChi3l1	65.9	11.9	9.1	8.9	3	0.4	0.8
Chi3l1-/-+rChi3l1	64.4	15	8.2	8.6	2.7	0.7	0.4
Chi3l1-/-+rChi3l1	67.9	12.7	8	7.9	2.2	0.7	0.7
LA
Group	M+0	M+1	M+2	M+3						t` test	P value	P value summary	Significantly different (P < 0.05)?
Chi3l1-/-	70.6375	1.02328	1.74609	26.5931						M+0	<0.001	***	Yes
Chi3l1-/-	69.0311	2.23734	2.82577	25.9058						M+1	0.241	ns	No
Chi3l1-/-	47.4294	1.27972	2.35208	48.9388						M+2	<0.001	***	Yes
Chi3l1-/-	46.5615	1.52672	2.7504	49.1614						M+3	<0.001	***	Yes
Chi3l1-/-	51.4159	0.856833	2.18498	45.5423
Chi3l1-/-	44.5324	1.45811	3.43079	50.5787
Chi3l1-/-+rChi3l1	90.1	0.8	1.2	7.8
Chi3l1-/-+rChi3l1	91.3	1.3	1.1	6.3
Chi3l1-/-+rChi3l1	91.1	1.4	1.1	6.4
Chi3l1-/-+rChi3l1	91.6	1.3	1	6
Chi3l1-/-+rChi3l1	91.5	1.1	1.1	6.3
Chi3l1-/-+rChi3l1	92.5	0.8	1.1	5.6
PHA
Group	M+0	M+1	M+2	M+3						t` test	P value	P value summary	Significantly different (P < 0.05)?
Chi3l1-/-	76.3144	0	0	23.6855						M+0	0.003	**	Yes
Chi3l1-/-	86.2317	0	0	13.7683						M+1	0	ns	No
Chi3l1-/-	72.4995	0	0	27.5005						M+2	0	ns	No
Chi3l1-/-	74.7771	0	0	25.2229						M+3	0.003	**	Yes
Chi3l1-/-	52.4678	0	0	47.5322
Chi3l1-/-	84.1809	0	0	15.8191
Chi3l1-/-+rChi3l1	95.6	0	0	4.4
Chi3l1-/-+rChi3l1	92.3	0	0	7.7
Chi3l1-/-+rChi3l1	94	0	0	6
Chi3l1-/-+rChi3l1	94.7	0	0	5.3
Chi3l1-/-+rChi3l1	90.8	0	0	9.2
Chi3l1-/-+rChi3l1	92.8	0	0	7.2
PA
Group	M+0	M+1	M+2	M+3						t` test	P value	P value summary	Significantly different (P < 0.05)?
Chi3l1-/-	98.4962	0	0.503913	0.999892						M+0	<0.001	***	Yes
Chi3l1-/-	97.8437	0.217361	0.762427	1.17647						M+1	0.341	ns	No
Chi3l1-/-	97.9768	0	0.554432	1.46874						M+2	0.066	ns	No
Chi3l1-/-	98.3196	0	0.560899	1.11945						M+3	<0.001	***	Yes
Chi3l1-/-	97.7479	0	0.596647	1.65545
Chi3l1-/-	98.4334	0	0.572825	0.993798
Chi3l1-/-+rChi3l1	99.1	0	0.4	0.4
Chi3l1-/-+rChi3l1	99	0	0.6	0.4
Chi3l1-/-+rChi3l1	99.1	0	0.5	0.4
Chi3l1-/-+rChi3l1	99.1	0	0.5	0.4
Chi3l1-/-+rChi3l1	99.1	0	0.5	0.4
Chi3l1-/-+rChi3l1	99	0	0.5	0.5
R5P
Group	M+0	M+1	M+2	M+3	M+4	M+5				t` test	P value	P value summary	Significantly different (P < 0.05)?
Chi3l1-/-	94.0432	0	0.366881	0	0.569176	5.26929				M+0	0.671	ns	No
Chi3l1-/-	95.7267	0	0	0.366881	0	4.19275				M+1	0.341	ns	No
Chi3l1-/-	89.0476	0.059017	0	0.080572	0.903152	8.06695				M+2	0.856	ns	No
Chi3l1-/-	91.4869	0	0	1.92331	0.64537	7.30071				M+3	0.793	ns	No
Chi3l1-/-	90.5518	0	0	0.567012	0.667737	7.94648				M+4	0.815	ns	No
Chi3l1-/-	91.2674	0	0	0.834016	0.524924	7.63852				M+5	0.443	ns	No
Chi3l1-/-+rChi3l1	91.8	0	0	0.5	0.4	7.3
Chi3l1-/-+rChi3l1	91.2	0	0.03	0.6	0.6	7.6
Chi3l1-/-+rChi3l1	91.5	0	0.06	0.7	0.7	7.1
Chi3l1-/-+rChi3l1	91.4	0	0	0.4	0.7	7.5
Chi3l1-/-+rChi3l1	91.8	0	0.2	0.5	0.5	7.1
Chi3l1-/-+rChi3l1	91.8	0	0	0.6	0.6	7
RU5P
Group	M+0	M+1	M+2	M+3	M+4	M+5				t` test	P value	P value summary	Significantly different (P < 0.05)?
Chi3l1-/-	94.1348	0	0	0.364214	0.318724	5.18224				M+0	0.691	ns	No
Chi3l1-/-	95.7188	0	0	0.080887	0	4.2003				M+1	0.341	ns	No
Chi3l1-/-	89.0364	0.092631	0	1.93532	0.865708	8.06991				M+2	0.19	ns	No
Chi3l1-/-	91.4475	0	0	0.570036	0.648372	7.33409				M+3	0.521	ns	No
Chi3l1-/-	90.5195	0	0	0.838858	0.670789	7.97086				M+4	0.573	ns	No
Chi3l1-/-	91.2218	0	0	0.573894	0.528747	7.67556				M+5	0.479	ns	No
Chi3l1-/-+rChi3l1	91.8	0	0	0.5	0.4	7.3
Chi3l1-/-+rChi3l1	91.3	0	0.02	0.6	0.6	7.5
Chi3l1-/-+rChi3l1	91.5	0	0.05	0.7	0.7	7.1
Chi3l1-/-+rChi3l1	91.4	0	0	0.4	0.7	7.4
Chi3l1-/-+rChi3l1	91.8	0	0.2	0.5	0.5	7.1
Chi3l1-/-+rChi3l1	91.8	0	0	0.6	0.6	7
S7P
Group	M+0	M+1	M+2	M+3	M+4	M+5	M+6	M+7		t` test	P value	P value summary	Significantly different (P < 0.05)?
Chi3l1-/-	74.7048	7.00181	8.09372	2.5945	2.87592	4.72926	0	0		M+0	0.329	ns	No
Chi3l1-/-	81.6213	7.99737	4.75793	0.948858	1.90882	2.76576	0	0		M+1	0.986	ns	No
Chi3l1-/-	72.3492	9.82833	7.94356	3.58179	1.12756	5.16959	0	0		M+2	0.862	ns	No
Chi3l1-/-	73.6505	9.97836	7.23822	1.97752	1.94416	5.21127	0	0		M+3	0.033	*	Yes
Chi3l1-/-	61.7308	8.54895	15.9914	2.94586	2.44325	8.33975	0	0		M+4	0.195	ns	No
Chi3l1-/-	65.5701	9.68074	13.0421	2.3188	3.2391	6.14924	0	0		M+5	0.025	ns	No
Chi3l1-/-+rChi3l1	74	8.7	10.3	1.3	3.1	2.6	0	0		M+6	0	ns	No
Chi3l1-/-+rChi3l1	74.7	9.8	8.8	0.7	2.3	3.7	0	0		M+7	0	ns	No
Chi3l1-/-+rChi3l1	76.2	9.2	8	0.8	2.9	2.9	0	0
Chi3l1-/-+rChi3l1	73.7	8.3	9.8	1.4	2.7	4	0	0
Chi3l1-/-+rChi3l1	74.1	9.4	8.3	2.4	2.8	2.9	0	0
Chi3l1-/-+rChi3l1	74.8	7.7	10	1.2	2.5	3.9	0	0

## Sheet: Figure S2D
Group	Supernatant OD value	Cell OD value	Percent cytotoxicity		t` test	P value	P value summary	Significantly different (P < 0.05)?
High glucose	0.5551	1.2788	19.444		High glucose vs Hight glucose+rChi3l1	0.004	**	Yes
High glucose	0.5374	1.2788	18.0599
High glucose	0.5164	1.2788	16.4177
Hight glucose+rChi3l1	0.3667	1.2547	4.80194
Hight glucose+rChi3l1	0.4656	1.2547	12.6843
Hight glucose+rChi3l1	0.4554	1.2547	11.8714
