# Supplementary material for: Hyperactivated glycolysis drives spatially patterned Kupffer cell depletion in MASLD
Source: eLife. 2026 May 26;14:RP109206. doi: 10.7554/eLife.109206 (PMC13211875; doi:10.7554/eLife.109206)
Supplement: Figure 5—source data 1. [file elife-109206-fig5-data1.xlsx]

## Sheet: Figure 5B
Name	WT_1	WT_2	WT_3	WT_4	WT_5	WT_6	Chi3l1-/-_1	Chi3l1-/-_2	Chi3l1-/-_3	Chi3l1-/-_4	Chi3l1-/-_5	Chi3l1-/-_6
2-Phosphoglyceric acid m0	4.66268e+06	2.1267e+06	2.77142e+06	2.16532e+06	1.81166e+06	1.04607e+06	1.77093e+06	8.40113e+06	6.00121e+06	2.04365e+06	1.52809e+06	1.09642e+06
2-Phosphoglyceric acid m1	0	0	0	0	0	0	0	61008.7	0	0	0	0
2-Phosphoglyceric acid m2	0	0	0	0	0	0	0	0	0	0	0	0
2-Phosphoglyceric acid m3	1.08392e+06	176906	292952	178742	171510	78031.1	413233	1.18808e+06	1.72997e+06	430272	820629	219035
3-Phosphoglyceric acid m0	4.62849e+06	2.1319e+06	2.74258e+06	2.168e+06	1.81168e+06	1.04612e+06	1.76982e+06	8.36732e+06	5.95379e+06	2.05896e+06	1.52804e+06	1.09601e+06
3-Phosphoglyceric acid m1	0	0	0	0	0	0	0	62221.9	0	0	0	0
3-Phosphoglyceric acid m2	0	0	0	0	0	0	0	0	0	0	0	0
3-Phosphoglyceric acid m3	1.11184e+06	184520	292967	178741	171510	78057.6	413340	1.24255e+06	1.73041e+06	436258	820629	219035
Dihydroxyacetone phosphate m0	0	9553.8	6645.35	71240.9	3054.03	2279	2425.63	27607.8	17993.2	27694.7	22777.5	17062.2
Dihydroxyacetone phosphate m1	0	0	0	0	0	0	0	0	0	0	0	0
Dihydroxyacetone phosphate m2	0	0	0	0	0	0	0	0	0	0	0	0
Dihydroxyacetone phosphate m3	0	0	0	0	0	0	0	0	130450	98985.5	92413	106785
F16P m0	288102	393706	416701	404820	197768	186058	192891	134087	450276	374923	708858	494652
F16P m1	0	0	0	0	0	0	0	0	0	0	0	0
F16P m2	0	0	0	0	0	0	0	0	0	0	0	0
F16P m3	0	0	0	0	0	0	0	0	0	0	0	0
F16P m4	0	0	0	0	0	0	0	0	0	0	0	0
F16P m5	0	0	0	0	0	0	0	0	0	0	0	0
F16P m6	0	0	0	0	0	0	0	0	0	0	0	0
Fructose 6-phosphate m0	453938	537597	743667	838707	558628	513981	580172	365758	718418	319466	305049	307641
Fructose 6-phosphate m1	120194	114507	165339	177467	103012	53120.7	116224	39452.8	153312	42.4573	49164.3	35338.3
Fructose 6-phosphate m2	50486	49028.6	121234	150280	61038.3	51564.5	58769.9	16817.3	111792	14060.3	81788.4	47474.9
Fructose 6-phosphate m3	94253.3	69344.3	147237	133402	90480.4	65115.1	102308	15736.2	179039	26116.7	92426.4	45001.2
Fructose 6-phosphate m4	36045.8	14506.5	30313.6	56839.6	33301.6	6138.16	26398.4	8358.3	42189.3	8698.82	31860.6	11569.3
Fructose 6-phosphate m5	0	0	0	0	0	0	0	0	0	0	0	0
Fructose 6-phosphate m6	39346.5	17546.6	15682.7	21058.2	15422.3	17658.9	117449	84948.8	341094	267330	148809	129578
Glucose 6-phosphate m0	2.41389e+06	2.47396e+06	4.19204e+06	3.87302e+06	2.25602e+06	1.86553e+06	3.3587e+06	1.88166e+06	2.91703e+06	2.18066e+06	2.65748e+06	2.62583e+06
Glucose 6-phosphate m1	353453	394510	474438	611413	461847	307140	468415	271148	504474	90175.6	260658	140274
Glucose 6-phosphate m2	270393	258088	315600	422445	292441	217878	278098	64264.4	267480	33751.6	235394	95150.4
Glucose 6-phosphate m3	315308	293938	365785	532682	350960	267140	382806	148048	430693	78569.4	379320	144080
Glucose 6-phosphate m4	109749	116761	169298	163091	132052	129558	140181	40474.3	122825	29200.2	168498	72412.6
Glucose 6-phosphate m5	27882.1	40419.3	27761.3	61278.5	34179.3	30848.3	27735.4	2051.6	24822.3	2970.79	80734.7	26879.9
Glucose 6-phosphate m6	81714.8	60263	161448	179412	41364.2	41108.6	57174.7	60928.1	122802	146069	191433	229601
Glucose m0	1.07375e+07	1.53461e+07	1.5647e+07	1.51648e+07	1.53159e+07	1.50666e+07	1.38225e+07	1.42892e+07	1.81484e+07	1.64265e+07	1.61792e+07	1.32953e+07
Glucose m1	0	0	0	0	0	0	0	0	0	0	0	0
Glucose m2	0	0	0	0	0	0	0	0	0	0	0	0
Glucose m3	10817.6	16039.7	28545.5	30155.6	24426	41110.7	30515.4	32015.3	109764	100957	98733.2	68807.6
Glucose m4	11333.8	5273.33	6626.96	3800.5	3802.3	4627.17	22378.3	18101.7	78724.3	43578.2	35674.5	56415.1
Glucose m5	42572.3	67860.9	32822.9	37946.5	42259.1	57306.5	90962.8	86378.5	170662	148576	163134	111878
Glucose m6	1.02251e+06	800133	835219	803980	876497	828591	1.29669e+06	1.38958e+06	2.29187e+06	1.90419e+06	1.97424e+06	1.67001e+06
Lactic acid m0	2.06999e+08	2.19883e+08	2.46566e+08	2.63475e+08	2.23356e+08	2.23473e+08	2.2528e+08	3.25481e+08	2.85533e+08	2.64769e+08	2.48637e+08	2.12012e+08
Lactic acid m1	4.32903e+06	2.50154e+06	3.1255e+06	2.51719e+06	3.50558e+06	2.25037e+06	3.26349e+06	1.05491e+07	7.70415e+06	8.68158e+06	4.14347e+06	6.94185e+06
Lactic acid m2	9.94509e+06	2.61814e+06	3.08791e+06	2.87995e+06	2.74958e+06	2.65234e+06	5.56872e+06	1.33235e+07	1.41599e+07	1.564e+07	1.05661e+07	1.63335e+07
Lactic acid m3	1.43234e+08	1.86725e+07	2.4871e+07	2.08196e+07	2.19007e+07	1.87813e+07	8.4812e+07	1.22146e+08	2.9462e+08	2.79553e+08	2.20233e+08	2.40798e+08
Phosphoenolpyruvic acid m0	1.17987e+06	225448	368718	184326	219300	113750	313070	2.36369e+06	676240	237168	213425	123838
Phosphoenolpyruvic acid m1	0	0	0	0	0	0	0	0	0	0	0	0
Phosphoenolpyruvic acid m2	0	0	0	0	0	0	0	0	0	0	0	0
Phosphoenolpyruvic acid m3	383231	19979.8	50325.5	33336.9	40592.7	12835.3	97166.9	377400	256511	79998.7	193348	23271.3
Pyruvic acid m0	5.83784e+07	5.83452e+07	6.39493e+07	8.82487e+07	5.56711e+07	5.56177e+07	7.39746e+07	8.01059e+07	6.93621e+07	5.60438e+07	9.00008e+07	4.43946e+07
Pyruvic acid m1	0	0	0	0	0	0	0	177956	0	0	0	0
Pyruvic acid m2	338516	260919	319987	440864	275585	302331	378459	624209	392507	319722	549359	258351
Pyruvic acid m3	621866	295833	227851	428395	202279	234588	750959	963190	1.03979e+06	638104	1.52424e+06	448214
Ribose-5-phosphate m0	2.78587e+06	1.11127e+07	9.34965e+06	7.04464e+06	8.92627e+06	9.94558e+06	1.03596e+07	2.83206e+06	9.62224e+06	7.96455e+06	1.10194e+07	7.96327e+06
Ribose-5-phosphate m1	0	0	0	7416.98	0	0	0	0	6377.22	0	0	0
Ribose-5-phosphate m2	0	0	0	4580.63	0	0	0	0	0	0	0	0
Ribose-5-phosphate m3	37912.2	115193	130612	128590	71816.5	86433.6	40414.6	2383.7	207828	49362.2	101493	49661.8
Ribose-5-phosphate m4	18674.8	91638.8	76451.7	83027.9	74198.6	74708.3	35317.6	0	97592.1	56183.8	81258	45800.7
Ribose-5-phosphate m5	209821	1.23419e+06	1.09879e+06	736473	946219	1.04756e+06	580452	124042	871692	635576	967020	666477
Ribulose-5-phosphate m0	2.76926e+06	1.10885e+07	9.36626e+06	7.12799e+06	8.88563e+06	9.89352e+06	1.04288e+07	2.82674e+06	9.56118e+06	7.92488e+06	1.09659e+07	7.90289e+06
Ribulose-5-phosphate m1	0	0	0	5831.05	0	0	0	0	9947.2	0	0	0
Ribulose-5-phosphate m2	0	0	0	3199.16	0	0	0	0	0	0	0	0
Ribulose-5-phosphate m3	37927.8	118740	130596	128589	72137.4	86482.6	40349.5	2388.73	207825	49399.6	101623	49718.6
Ribulose-5-phosphate m4	18676.6	91551	76449.9	83040.8	74195.9	73136.2	35309.9	0	92964.1	56188.2	81261.9	45807.4
Ribulose-5-phosphate m5	206372	1.23403e+06	1.09548e+06	734868	946214	1.04758e+06	574116	124042	866587	635575	965621	664962
Sedoheptulose 7-phosphate m0	955625	1.6206e+06	1.69184e+06	1.89807e+06	1.48348e+06	1.45864e+06	1.41593e+06	956068	992397	1.3955e+06	748413	1.39896e+06
Sedoheptulose 7-phosphate m1	107724	160207	226363	229279	193282	175839	132710	93676.9	134813	189065	103646	206542
Sedoheptulose 7-phosphate m2	101466	224248	242717	303979	195297	260881	153406	55731.9	108960	137146	193877	278257
Sedoheptulose 7-phosphate m3	13253.3	56137.5	76968.3	105746	33397.1	30811.8	49175.2	11114.4	49130.6	37469.1	35715.1	49472.5
Sedoheptulose 7-phosphate m4	37986.6	58689.7	68167.1	55142.1	45533.5	42195.9	54509.2	22358.9	15466.5	36837.1	29621.6	69107.4
Sedoheptulose 7-phosphate m5	52848.8	106784	147703	141274	119115	121754	89636.8	32396.6	70910.1	98740.8	101110	131196
Sedoheptulose 7-phosphate m6	0	0	62.8309	0	0	0	0	0	0	0	0	0
Sedoheptulose 7-phosphate m7	0	0	0	0	0	0	0	0	0	0	0	0

## Sheet: Figure 5C
Name	WT_1	WT_2	WT_3	WT_4	WT_5	WT_6	Chi3l1-/-_1	Chi3l1-/-_2	Chi3l1-/-_3	Chi3l1-/-_4	Chi3l1-/-_5	Chi3l1-/-_6
2-Phosphoglyceric acid	1.08392e+06	176906	292952	178742	171510	78031.1	413233	1.24909e+06	1.72997e+06	430272	820629	219035
3-Phosphoglyceric acid	1.11184e+06	184520	292967	178741	171510	78057.6	413340	1.30477e+06	1.73041e+06	436258	820629	219035
Dihydroxyacetone phosphate	0	0	0	0	0	0	0	0	130450	98985.5	92413	106785
F16P	0	0	0	0	0	0	0	0	0	0	0	0
Fructose 6-phosphate	340326	264933	479807	539048	303255	193597	421150	165313	827427	316249	404049	268962
Glucose 6-phosphate	1.1585e+06	1.16398e+06	1.51433e+06	1.97032e+06	1.31284e+06	993674	1.35441e+06	586914	1.4731e+06	380736	1.31604e+06	708399
Glucose	1.08723e+06	889307	903214	875883	946984	931636	1.44055e+06	1.52608e+06	2.65102e+06	2.1973e+06	2.27178e+06	1.90711e+06
Lactic acid	1.57509e+08	2.37921e+07	3.10844e+07	2.62167e+07	2.81559e+07	2.3684e+07	9.36442e+07	1.46018e+08	3.16484e+08	3.03875e+08	2.34943e+08	2.64073e+08
Phosphoenolpyruvic acid	383231	19979.8	50325.5	33336.9	40592.7	12835.3	97166.9	377400	256511	79998.7	193348	23271.3
Pyruvic acid	960383	556752	547838	869258	477864	536919	1.12942e+06	1.76536e+06	1.4323e+06	957826	2.0736e+06	706565
Ribose-5-phosphate	266408	1.44102e+06	1.30585e+06	960089	1.09223e+06	1.2087e+06	656184	126426	1.18349e+06	741122	1.14977e+06	761939
Ribulose-5-phosphate	262976	1.44432e+06	1.30252e+06	955527	1.09255e+06	1.2072e+06	649776	126431	1.17732e+06	741163	1.14851e+06	760488
Sedoheptulose 7-phosphate	313279	606066	761981	835420	586624	631482	479437	215279	379280	499259	463970	734575

## Sheet: Figure 5D
GLC	M+0	M+1	M+2	M+3	M+4	M+5	M+6		t` test	P value	P value summary	Significantly different (P < 0.05)?
WT	90.8054	0	0	0.091483	0.095848	0.360028	8.64721		M+0	<0.001	***	Yes
WT	94.5224	0	0	0.098795	0.032481	0.417982	4.92833		M+1	0	ns	No
WT	94.5426	0	0	0.172478	0.040042	0.198323	5.04658		M+2	0	ns	No
WT	94.5396	0	0	0.187995	0.023693	0.236565	5.01214		M+3	0.006	**	Yes
WT	94.177	0	0	0.150194	0.02338	0.259849	5.38954		M+4	0.002	**	Yes
WT	94.1766	0	0	0.256971	0.028923	0.358206	5.17928		M+5	<0.001	***	Yes
Chi3l1-/-	90.5619	0	0	0.199929	0.146617	0.595966	8.49561		M+6	<0.001	***	Yes
Chi3l1-/-	90.3506	0	0	0.202433	0.114457	0.546173	8.78635
Chi3l1-/-	87.2544	0	0	0.527726	0.378492	0.820512	11.0189
Chi3l1-/-	88.2016	0	0	0.542086	0.233993	0.797778	10.2245
Chi3l1-/-	87.6875	0	0	0.535112	0.193348	0.884151	10.6999
Chi3l1-/-	87.4552	0	0	0.45261	0.371092	0.735923	10.9852
2PA	M+0	M+1	M+2	M+3					t` test	P value	P value summary	Significantly different (P < 0.05)?
WT	81.138	0	0	18.862					M+0	0.015	*	Yes
WT	92.3205	0	0	7.67952					M+1	0	ns	No
WT	90.4401	0	0	9.55993					M+2	0	ns	No
WT	92.3747	0	0	7.62534					M+3	0.017	*	Yes
WT	91.3517	0	0	8.64829
WT	93.0584	0	0	6.94165
Chi3l1-/-	81.0805	0	0	18.9195
Chi3l1-/-	87.0563	0	0	12.3115
Chi3l1-/-	77.6234	0	0	22.3766
Chi3l1-/-	82.6077	0	0	17.3923
Chi3l1-/-	65.0606	0	0	34.9394
Chi3l1-/-	83.3491	0	0	16.6509
3PA	M+0	M+1	M+2	M+3					t` test	P value	P value summary	Significantly different (P < 0.05)?
WT	80.6311	0	0	19.3689					M+0	0.015	*	Yes
WT	92.0343	0	0	7.96572					M+1	0	ns	No
WT	90.3488	0	0	9.6512					M+2	0	ns	No
WT	92.3834	0	0	7.61657					M+3	0.017	*	Yes
WT	91.3518	0	0	8.6482
WT	93.0565	0	0	6.94353
Chi3l1-/-	81.0669	0	0	18.9331
Chi3l1-/-	86.5099	0	0	12.8468
Chi3l1-/-	77.4809	0	0	22.5191
Chi3l1-/-	82.5163	0	0	17.4837
Chi3l1-/-	65.0598	0	0	34.9402
Chi3l1-/-	83.3439	0	0	16.6561
DP	M+0	M+1	M+2	M+3					t` test	P value	P value summary	Significantly different (P < 0.05)?
WT		0	0						M+0	0.019	*	Yes
WT	100	0	0	0					M+3	0.019	*	Yes
WT	100	0	0	0
WT	100	0	0	0
WT	100	0	0	0
WT	100	0	0	0
Chi3l1-/-	100	0	0	0
Chi3l1-/-	100	0	0	0
Chi3l1-/-	12.1213	0	0	87.8787
Chi3l1-/-	21.8619	0	0	78.1381
Chi3l1-/-	19.7737	0	0	80.2263
Chi3l1-/-	13.7768	0	0	86.2232
FBP	M+0	M+1	M+2	M+3	M+4	M+5	M+6
WT	100	0	0	0	0	0	0
WT	100	0	0	0	0	0	0
WT	100	0	0	0	0	0	0
WT	100	0	0	0	0	0	0
WT	100	0	0	0	0	0	0
WT	100	0	0	0	0	0	0
Chi3l1-/-	100	0	0	0	0	0	0
Chi3l1-/-	100	0	0	0	0	0	0
Chi3l1-/-	100	0	0	0	0	0	0
Chi3l1-/-	100	0	0	0	0	0	0
Chi3l1-/-	100	0	0	0	0	0	0
Chi3l1-/-	100	0	0	0	0	0	0
F6P	M+0	M+1	M+2	M+3	M+4	M+5	M+6		t` test	P value	P value summary	Significantly different (P < 0.05)?
WT	57.1521	15.1328	6.35632	11.8667	4.53826	0	4.95383		M+0	0.037	*	Yes
WT	66.9878	14.2683	6.10926	8.6407	1.8076	0	2.18641		M+1	0.018	*	Yes
WT	60.7833	13.5139	9.90903	12.0343	2.47767	0	1.28182		M+2	0.355	ns	No
WT	60.8749	12.8809	10.9076	9.68258	4.12553	0	1.52845		M+3	0.274	ns	No
WT	64.8149	11.952	7.08197	10.498	3.86382	0	1.78938		M+4	0.0539	ns	No
WT	72.6394	7.5074	7.28746	9.20253	0.867488	0	2.49568		M+5	0	ns	No
Chi3l1-/-	57.9406	11.607	5.86923	10.2173	2.63635	0	11.7294		M+6	0.001	**	Yes
Chi3l1-/-	68.8717	7.4289	3.16667	2.96311	1.57386	0	15.9957
Chi3l1-/-	46.4741	9.91771	7.23176	11.582	2.72921	0	22.0652
Chi3l1-/-	50.2531	0.006679	2.21173	4.10824	1.36835	0	42.0519
Chi3l1-/-	43.0193	6.93336	11.5342	13.0344	4.49312	0	20.9857
Chi3l1-/-	53.354	6.12871	8.23356	7.80453	2.00645	0	22.4727
G6P	M+0	M+1	M+2	M+3	M+4	M+5	M+6		t` test	P value	P value summary	Significantly different (P < 0.05)?
WT	67.5708	9.894	7.56896	8.82624	3.07215	0.780488	2.28739		M+0	0.66	ns	No
WT	68.0044	10.8443	7.09434	8.07981	3.20953	1.11105	1.65651		M+1	0.107	ns	No
WT	73.4625	8.31419	5.53066	6.41013	2.96682	0.486497	2.82926		M+2	0.008	**	Yes
WT	66.2809	10.4634	7.22952	9.11605	2.79106	1.04869	3.07037		M+3	0.181	ns	No
WT	63.214	12.941	8.19423	9.83393	3.7001	0.957707	1.15903		M+4	0.12	ns	No
WT	65.2464	10.7422	7.62026	9.34319	4.53127	1.07891	1.43777		M+5	0.505	ns	No
Chi3l1-/-	71.2629	9.93855	5.90053	8.12215	2.97427	0.588474	1.2131		M+6	0.07	ns	No
Chi3l1-/-	76.2246	10.984	2.6033	5.9973	1.63958	0.083109	2.46815
Chi3l1-/-	66.4452	11.4911	6.09276	9.81049	2.79775	0.565412	2.79723
Chi3l1-/-	85.1356	3.52056	1.3177	3.06745	1.14001	0.115983	5.7027
Chi3l1-/-	66.8798	6.55988	5.92407	9.54619	4.24052	2.03182	4.81772
Chi3l1-/-	78.7537	4.2071	2.85374	4.32125	2.17179	0.80618	6.88619
LA	M+0	M+1	M+2	M+3					t` test	P value	P value summary	Significantly different (P < 0.05)?
WT	56.7887	1.18764	2.72836	39.2953					M+0	0.002	**	Yes
WT	90.2361	1.02659	1.07444	7.66285					M+1	0.174	ns	No
WT	88.8045	1.12569	1.11216	8.95766					M+2	0.008	**	Yes
WT	90.9501	0.868922	0.994143	7.18681					M+3	0.003	**	Yes
WT	88.8054	1.3938	1.09322	8.70761
WT	90.4174	0.910502	1.07314	7.59894
Chi3l1-/-	70.6375	1.02328	1.74609	26.5931
Chi3l1-/-	69.0311	2.23734	2.82577	25.9058
Chi3l1-/-	47.4294	1.27972	2.35208	48.9388
Chi3l1-/-	46.5615	1.52672	2.7504	49.1614
Chi3l1-/-	51.4159	0.856833	2.18498	45.5423
Chi3l1-/-	44.5324	1.45811	3.43079	50.5787
PHA	M+0	M+1	M+2	M+3					t` test	P value	P value summary	Significantly different (P < 0.05)?
WT	75.4827	0	0	24.5173					M+0	0.065	ns	No
WT	91.8592	0	0	8.1408					M+1	0	ns	No
WT	87.9904	0	0	12.0096					M+2	0	ns	No
WT	84.6842	0	0	15.3158					M+3	0.065	ns	No
WT	84.381	0	0	15.619
WT	89.8603	0	0	10.1396
Chi3l1-/-	76.3144	0	0	23.6855
Chi3l1-/-	86.2317	0	0	13.7683
Chi3l1-/-	72.4995	0	0	27.5005
Chi3l1-/-	74.7771	0	0	25.2229
Chi3l1-/-	52.4678	0	0	47.5322
Chi3l1-/-	84.1809	0	0	15.8191
PA	M+0	M+1	M+2	M+3					t` test	P value	P value summary	Significantly different (P < 0.05)?
WT	98.3815	0	0.570481	1.04799					M+0	0.001	**	Yes
WT	99.0548	0	0.442972	0.502246					M+1	0	ns	No
WT	99.1506	0	0.496125	0.353274					M+2	0.059	ns	No
WT	99.0246	0	0.494696	0.480705					M+3	0.001	**	Yes
WT	99.1489	0	0.490811	0.360255
WT	99.0439	0	0.538389	0.417754
Chi3l1-/-	98.4962	0	0.503913	0.999892
Chi3l1-/-	97.8437	0	0.762427	1.17647
Chi3l1-/-	97.9768	0	0.554432	1.46874
Chi3l1-/-	98.3196	0	0.560899	1.11945
Chi3l1-/-	97.7479	0	0.596647	1.65545
Chi3l1-/-	98.4334	0	0.572825	0.993798
R5P	M+0	M+1	M+2	M+3	M+4	M+5			t` test	P value	P value summary	Significantly different (P < 0.05)?
WT	91.2718	0	0	1.24209	0.611831	6.87425			M+0	0.021	*	Yes
WT	88.5212	0	0	0.917605	0.729974	9.83125			M+1	0.766	ns	No
WT	87.7448	0	0	1.22577	0.717486	10.3119			M+2	0.424	ns	No
WT	88.006	0.092657	0.057224	1.60642	1.03723	9.20047			M+3	0.188	ns	No
WT	89.0978	0	0	0.716839	0.740616	9.44471			M+4	0.175	ns	No
WT	89.1638	0	0	0.774892	0.669772	9.39152			M+5	0.014	*	Yes
Chi3l1-/-	94.0432	0	0.366881	0	0.569176	5.26929
Chi3l1-/-	95.7267	0	0	0.366881	0	4.19275
Chi3l1-/-	89.0476	0.059017	0	0.080572	0.903152	8.06695
Chi3l1-/-	91.4869	0	0	1.92331	0.64537	7.30071
Chi3l1-/-	90.5518	0	0	0.567012	0.667737	7.94648
Chi3l1-/-	91.2674	0	0	0.834016	0.524924	7.63852
RU5P	M+0	M+1	M+2	M+3	M+4	M+5			t` test	P value	P value summary	Significantly different (P < 0.05)?
WT	91.3273	0	0	1.25082	0.615935	6.80593			M+0	0.023	*	Yes
WT	88.4757	0	0	0.94743	0.730489	9.84639			M+1	0.865	ns	No
WT	87.7913	0	0	1.22409	0.716575	10.2681			M+2	0.341	ns	No
WT	88.1793	0.072135	0.039576	1.59075	1.02729	9.09094			M+3	0.252	ns	No
WT	89.0506	0	0	0.722952	0.743582	9.48283			M+4	0.109	ns	No
WT	89.125	0	0	0.779072	0.658842	9.43705			M+5	0.016	*	Yes
Chi3l1-/-	94.1348	0	0	0.364214	0.318724	5.18224
Chi3l1-/-	95.7188	0	0	0.080887	0	4.2003
Chi3l1-/-	89.0364	0.092631	0	1.93532	0.865708	8.06991
Chi3l1-/-	91.4475	0	0	0.570036	0.648372	7.33409
Chi3l1-/-	90.5195	0	0	0.838858	0.670789	7.97086
Chi3l1-/-	91.2218	0	0	0.573894	0.528747	7.67556
S7P	M+0	M+1	M+2	M+3	M+4	M+5	M+6	M+7		t` test	P value	P value summary	Significantly different (P < 0.05)?
WT	75.311	8.48954	7.99638	1.04447	2.99365	4.16492	0	0		M+0	0.928	ns	No
WT	72.7815	7.19492	10.071	2.52114	2.63576	4.79568	0	0		M+1	0.58	ns	No
WT	68.9471	9.22493	9.89141	3.13668	2.778	6.01931	0.002561	0		M+2	0.725	ns	No
WT	69.4376	8.38779	11.1205	3.86855	2.01728	5.16828	0	0		M+3	0.842	ns	No
WT	71.662	9.33681	9.43419	1.61331	2.19958	5.75406	0	0		M+4	0.614	ns	No
WT	69.7873	8.41289	12.4817	1.47417	2.01883	5.82521	0	0		M+5	0.897	ns	No
Chi3l1-/-	74.7048	7.00181	8.09372	2.5945	2.87592	4.72926	0	0		M+6	0.341	ns	No
Chi3l1-/-	81.6213	7.99737	4.75793	0.948858	1.90882	2.76576	0	0		M+7	0	ns	No
Chi3l1-/-	72.3492	9.82833	7.94356	3.58179	1.12756	5.16959	0	0
Chi3l1-/-	73.6505	9.97836	7.23822	1.97752	1.94416	5.21127	0	0
Chi3l1-/-	61.7308	8.54895	15.9914	2.94586	2.44325	8.33975	0	0
Chi3l1-/-	65.5701	9.68074	13.0421	2.3188	3.2391	6.14924	0	0

## Sheet: Figure 5E
Time (minutes)	WT				Chi3l1-/-
1.38166	27.8475	37.9261	34.828	33.5916	32.5436	35.8068	45.0909	39.109
9.87527	27.7936	38.1556	34.5511	32.655	31.4748	35.4423	44.4649	39.341
18.376	28.3799	38.0005	34.5336	32.8159	30.6949	34.8554	45.2683	39.1019
26.9884	82.6325	103.684	94.3167	75.1546	98.4366	109.98	136.076	113.458
35.4856	90.2797	113.243	102.405	80.3512	109.821	122.664	151.575	128.818
43.9849	88.4728	109.483	97.9229	76.7668	117.399	126.092	153.966	128.648
52.5908	97.5924	122.789	104.693	79.0994	191.635	146.923	171.58	146.648
61.0891	115.667	140.07	127.147	99.1373	191.426	162.831	195.666	163.251
69.8039	117.309	144.794	131.508	104.253	183.772	161.671	193.56	163.49
78.3918	20.5167	26.4147	24.3389	22.9274	27.8201	25.4215	32.8606	27.266
87.0801	18.3965	24.157	21.6365	20.0145	26.6414	24.2176	30.7713	24.6148
95.577	18.8409	23.0836	21.2978	19.3205	25.5581	24.5665	29.8033	24.3963

## Sheet: Figure 5F
	WT				Chi3l1-/-					t` test	P value	P value summary	Significantly different (P < 0.05)?
Basal glycolytic capacity	61.9	75.24	67.87	47.54	86.7	91.24	108.7	89.55		Basal glycolytic capacity	0.007	**	Yes
Total glycolytic capacity	88.93	106.79	96.97	71.44	160.73	127.98	150.4	124.15		Total glycolytic capacity	0.005	**	Yes
