# Supplementary material for: Hyperactivated glycolysis drives spatially patterned Kupffer cell depletion in MASLD
Source: eLife. 2026 May 26;14:RP109206. doi: 10.7554/eLife.109206 (PMC13211875; doi:10.7554/eLife.109206)
Supplement: Figure 6—figure supplement 1—source data 1. [file elife-109206-fig6-figsupp1-data1.xlsx]

## Sheet: Figure S1B
Group	IntDen	IntDen	Average	Chi3l1 fluoresence relative to NCD		t` test	P value	P value summary	Significantly different (P < 0.05)?
NCD M1	0.0809	0.066475	0.061575	1.07958		NCD VS HFHC	0.017	*	Yes
	0.062
	0.066
	0.057
NCD M2	0.061	0.06		0.974421
	0.063
	0.058
	0.062
	0.056
NCD M3	0.054	0.05825		0.946001
	0.053
	0.075
	0.051
HFHC M1	0.064	0.072		1.16931
	0.078
	0.074
	0.07
	0.074
HFHC M2	0.089	0.077		1.25051
	0.064
	0.072
	0.083
HFHC M3	0.062	0.071625		1.16322
	0.068
	0.083
	0.064
	0.069
	0.063
	0.089
	0.075
