# Supplementary material for: Hyperactivated glycolysis drives spatially patterned Kupffer cell depletion in MASLD
Source: eLife. 2026 May 26;14:RP109206. doi: 10.7554/eLife.109206 (PMC13211875; doi:10.7554/eLife.109206)
Supplement: Figure 6—figure supplement 2—source data 1. [file elife-109206-fig6-figsupp2-data1.xlsx]

## Sheet: Figure S2B
	Ki67+TIM4+ cells	TIM4+cells	Ki67+TIM4+ cells/TIM4+cells(%)	Ki67+TIM4+ cells/TIM4+cells(%) average		One-way analysis of variance (ANOVA)	P value	P value summary	Significantly different (P < 0.05)?
WT NCD M1	0	15	0	2.9835		WT NCD VS Clec4f cre NCD	0.065	*	Yes
	0	25	0			WT NCD VS Clec4f cre HFHC	0.001	**	Yes
	4	37	10.8108			Clec4f cre NCD VS Clec4f cre HFHC	0.035	ns	No
	0	45	0
	2	43	4.65116
	1	41	2.43902
WT NCD M2	2	37	5.40541	7.03257
	2	25	8
	2	26	7.69231
WT NCD M3	2	27	7.40741	8.16799
	3	28	10.7143
	3	42	7.14286
	2	27	7.40741
WT NCD M4	2	33	6.06061	5.10269
	3	49	6.12245
	1	32	3.125
Clec4f cre NCD M1	1	26	3.84615	11.1732
	2	34	5.88235
	4	28	14.2857
	4	30	13.3333
	5	27	18.5185
Clec4f cre NCD M2	1	29	3.44828	6.90082
	3	33	9.09091
	3	24	12.5
	1	39	2.5641
Clec4f cre NCD M3	3	25	12	9.62072
	3	22	13.6364
	1	31	3.22581
Clec4f cre NCD M4	4	30	13.3333	9.78077
	2	34	5.88235
	2	27	7.40741
	4	32	12.5
Clec4f cre HFHC M1	1	5	20	16.1111
	2	6	33.3333
	1	9	11.1111
	0	7	0
Clec4f cre HFHC M2	3	20	15	15.9054
	2	19	10.5263
	3	14	21.4286
	1	6	16.6667
Clec4f cre HFHC M3	2	10	20	12.2222
	0	11	0
	2	12	16.6667
Clec4f cre HFHC M4	2	15	13.3333	10.0298
	2	16	12.5
	2	14	14.2857
	0	14	0
