# Supplementary material for: Hyperactivated glycolysis drives spatially patterned Kupffer cell depletion in MASLD
Source: eLife. 2026 May 26;14:RP109206. doi: 10.7554/eLife.109206 (PMC13211875; doi:10.7554/eLife.109206)
Supplement: Figure 6—source data 1. [file elife-109206-fig6-data1.xlsx]

## Sheet: Figure 6B
Group	Cleaved Caspase 3+	Nucleus	Percentage of Cleaved Caspase 3+ Cells		t` test	P value	P value summary	Significantly different (P < 0.05)?
WT Blank	0	30	0		WT Blank VS Chi3l1-/- Blank	0.091624	ns	No
	0	38	0		WT ISO VS Chi3l1-/- ISO	0.440376	ns	No
	0	35	0		WT PA VS Chi3l1-/- PA	0.001743	**	Yes
	1	44	2.27273
	0	38	0
	0	28	0
	0	32	0
	0	34	0
	1	34	2.94118
	0	38	0
	0	35	0
	0	33	0
	1	33	3.0303
	0	38	0
	0	29	0
	0	46	0
	0	44	0
Chi3l1-/- Blank	0	33	0
	0	43	0
	0	32	0
	1	37	2.7027
	0	40	0
	2	43	4.65116
	0	37	0
	0	33	0
	1	28	3.57143
	0	26	0
	0	36	0
	0	35	0
	1	40	2.5
	2	34	5.88235
	1	36	2.77778
WT ISO	0	30	0
	0	32	0
	0	27	0
	2	34	5.88235
	0	22	0
	0	34	0
	1	27	3.7037
	0	28	0
	1	37	2.7027
	0	40	0
	1	41	2.43902
	1	43	2.32558
	0	45	0
	0	35	0
Chi3l1-/- ISO	3	38	7.89474
	1	46	2.17391
	0	53	0
	1	42	2.38095
	1	39	2.5641
	0	49	0
	1	42	2.38095
	0	50	0
	0	54	0
	2	53	3.77358
	0	49	0
	1	47	2.12766
	1	45	2.22222
	0	43	0
WT PA	3	46	6.52174
	4	48	8.33333
	3	40	7.5
	3	38	7.89474
	3	37	8.10811
	5	44	11.3636
	6	39	15.3846
	2	37	5.40541
	4	41	9.7561
	6	43	13.9535
	6	43	13.9535
	5	45	11.1111
	4	47	8.51064
	3	44	6.81818
Chi3l1-/- PA	6	45	13.3333
	5	49	10.2041
	7	49	14.2857
	5	41	12.1951
	7	50	14
	6	45	13.3333
	8	46	17.3913
	7	45	15.5556
	5	43	11.6279
	5	30	16.6667
	5	45	11.1111
	4	43	9.30233
	6	52	11.5385
	5	42	11.9048
	4	32	12.5

## Sheet: Figure 6C
Group		Supernatant OD value	Cell OD value	Percent cytotoxicity		t` test	P value	P value summary	Significantly different (P < 0.05)?
Blank	WT 1	0.4076	1.3768	13.7057		WT Blank VS Chi3l1-/- Blank	0.001	**	Yes
	WT 2	0.4546	1.3857	17.0095		WT ISO VS Chi3l1-/- ISO	0.002	**	Yes
	WT 3	0.4452	1.394	16.2339		WT PA VS Chi3l1-/- PA	0.001	**	Yes
	Chi3l1-/- 1	0.5509	1.2383	26.811
	Chi3l1-/- 2	0.5884	1.2599	29.3277
	Chi3l1-/- 3	0.5615	1.268	27.0189
ISO	WT 1	0.4831	1.3115	20.1449
	WT 2	0.4831	1.3136	20.1127
	WT 3	0.4554	1.3274	17.8168
	Chi3l1-/- 1	0.6343	1.112	37.3561
	Chi3l1-/- 2	0.6593	1.441	30.5621
	Chi3l1-/- 3	0.7087	1.4614	33.5158
PA800	WT 1	0.6004	1.3954	27.3398
	WT 2	0.5799	1.3973	25.8355
	WT 3	0.6038	1.3807	27.8772
	Chi3l1-/- 1	0.6957	1.3226	36.0502
	Chi3l1-/- 2	0.7312	1.2991	39.435
	Chi3l1-/- 3	0.7142	1.2334	40.1573

## Sheet: Figure 6E
Group	Number of KCs/g liver(105)		t` test	P value	P value summary	Significantly different (P < 0.05)?
Clec4f Cre HFHC 0w M1	16.002		Clec4f Cre HFHC 0w VS Chi3l1-KpKO HFHC 0w	0.356429	ns	No
Clec4f Cre HFHC 0w M2	15.609		Clec4f Cre HFHC 16w VS Chi3l1-KpKO HFHC 16w	0.007161	**	Yes
Clec4f Cre HFHC 0w M3	20.284
Clec4f Cre HFHC 0w M4	20.464
Chi3l1-KpKO HFHC 0w M1	14.775
Chi3l1-KpKO HFHC 0w M2	10.848
Chi3l1-KpKO HFHC 0w M3	20.564
Chi3l1-KpKO HFHC 0w M4	16.541
Clec4f Cre HFHC 16w M1	19.869
Clec4f Cre HFHC 16w M2	25.408
Clec4f Cre HFHC 16w M3	21.977
Chi3l1-KpKO HFHC 16w M1	9.572
Chi3l1-KpKO HFHC 16w M2	12.817
Chi3l1-KpKO HFHC 16w M3	16.632
Chi3l1-KpKO HFHC 16w M4	12.393

## Sheet: Figure 6G
	TIM4+	TIM4+TUNEL+	TIM4+TUNEL+/TIM4+	TIM4+TUNEL+/TIM4+Average		t` test	P value	P value summary	Significantly different (P < 0.05)?
Clec4f Cre HFHC 0w M1	61	0	0	0		Clec4f Cre HFHC 0w VS Chi3l1-KpKO HFHC 0w	0.55974	ns	No
	64	0	0			Clec4f Cre HFHC 16w VS Chi3l1-KpKO HFHC 16w	0.038018	*	Yes
	58	0	0
	52	0	0
	58	0	0
	60	0	0
Clec4f Cre HFHC 0w M2	59	0	0	0.377358
	56	0	0
	53	1	1.88679
	54	0	0
	58	0	0
Clec4f Cre HFHC 0w M3	68	1	1.47059	1.63506
	59	2	3.38983
	58	1	1.72414
	62	2	3.22581
	58	0	0
	66	0	0
Clec4f Cre HFHC 0w M4	53	0	0	0
	61	0	0
	72	0	0
	58	0	0
Chi3l1-KpKO HFHC 0w M1	50	0	0	0.292398
	50	0	0
	57	1	1.75439
	61	0	0
	51	0	0
	55	0	0
Chi3l1-KpKO HFHC 0w M2	57	0	0	0.68287
	64	1	1.5625
	50	0	0
	53	0	0
	54	1	1.85185
Chi3l1-KpKO HFHC 0w M3	54	0	0	0
	55	0	0
	61	0	0
	53	0	0
	55	0	0
Chi3l1-KpKO HFHC 0w M4	51	0	0	0
	49	0	0
	68	0	0
	60	0	0
Clec4f Cre HFHC 16w M1	45	17	37.7778	46.1048
	41	19	46.3415
	46	24	52.1739
	52	23	44.2308
	42	21	50
Clec4f Cre HFHC 16w M2	51	24	47.0588	50.8864
	35	17	48.5714
	35	20	57.1429
	31	15	48.3871
	29	14	48.2759
	34	19	55.8824
Clec4f Cre HFHC 16w M3	40	23	57.5	53.5121
	38	18	47.3684
	39	21	53.8462
	40	22	55
	39	21	53.8462
Clec4f Cre HFHC 16w M4	29	15	51.7241	54.6071
	39	25	64.1026
	38	23	60.5263
	39	21	53.8462
	41	24	58.5366
	42	19	45.2381
	29	14	48.2759
Chi3l1-KpKO HFHC 16w M1	28	15	53.5714	55.6405
	24	14	58.3333
	32	19	59.375
	39	20	51.2821
Chi3l1-KpKO HFHC 16w M2	27	13	48.1481	55.1055
	37	21	56.7568
	24	12	50
	29	19	65.5172
Chi3l1-KpKO HFHC 16w M3	43	27	62.7907	65.0388
	36	24	66.6667
	35	24	68.5714
	43	29	67.4419
	42	26	61.9048
	35	22	62.8571
Chi3l1-KpKO HFHC 16w M4	23	13	56.5217	62.0611
	30	21	70
	41	23	56.0976
	32	21	65.625
